# Supplementary material for: Recurrent rearrangements of FOS and FOSB define osteoblastoma
Source: PubMed Central journal article supplement (PMC5984627; doi:10.1038/s41467-018-04530-z), 2018-06-01

Recurrent rearrangements of *FOS* and  
*FOSB* define osteoblastoma

Supplementary Figures

Fittall *et al*

**Supplementary Figure 1. Copy number profiles for the sequenced osteoblastoma samples**

a) Genome wide views. Copy number is shown on the y-axis and genomic position on the x-axis. Total copy number is shown as purple segments and the minor copy number state is shown in orange.

b) Detailed analysis of chromosome 22. Total copy number is shown in green segments, minor allele copy number is in green in the top panel. Sequentially below plots reveal LogR (ratio of tumour to normal coverage as computed by ASCAT), tumour coverage, normal sample coverage, B-Allele Frequency (BAF). In LogR and BAF plots, poorly performing snps are highlighted in red. No reliable copy number aberrations are seen across chromosome 22 in any sample.

a

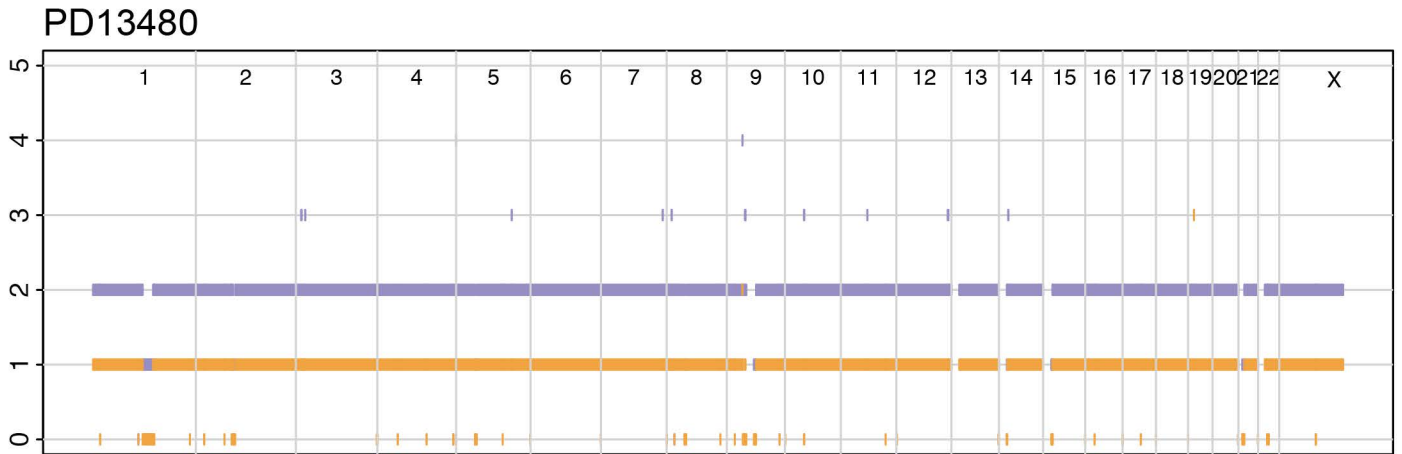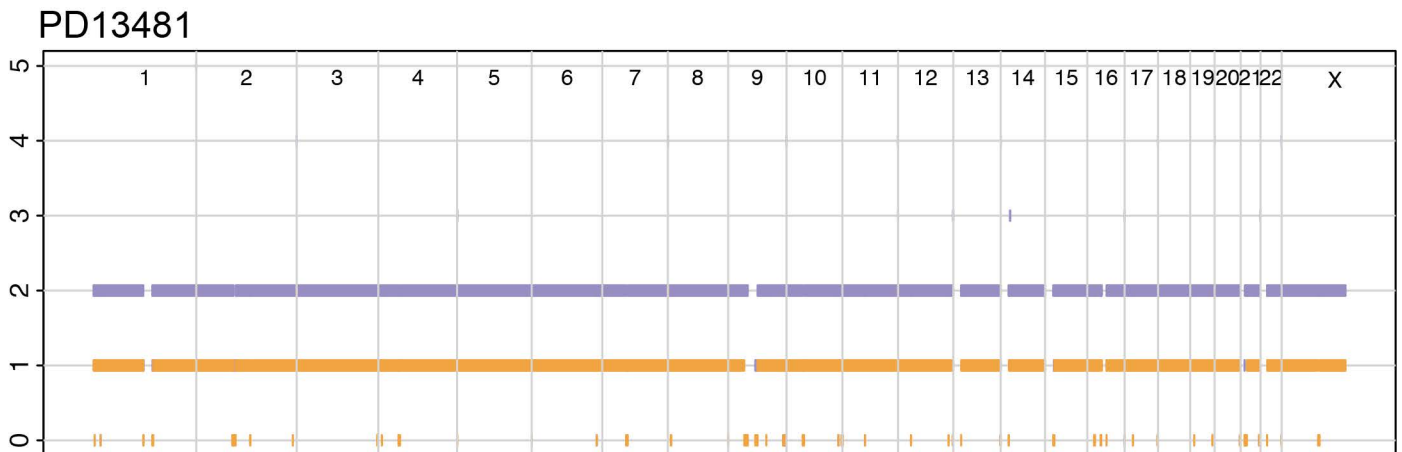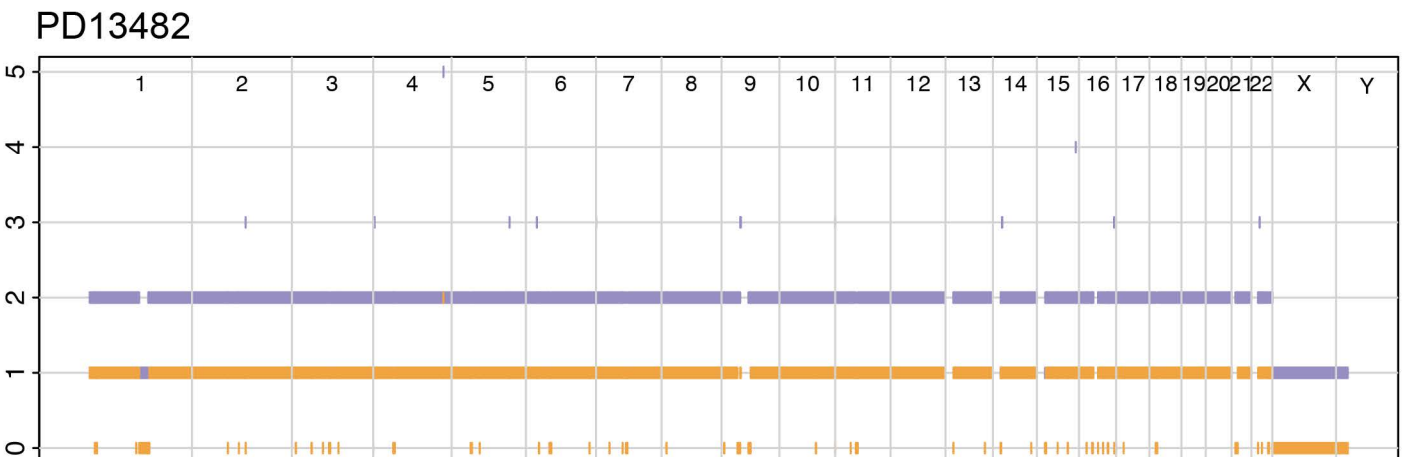

### PD7519

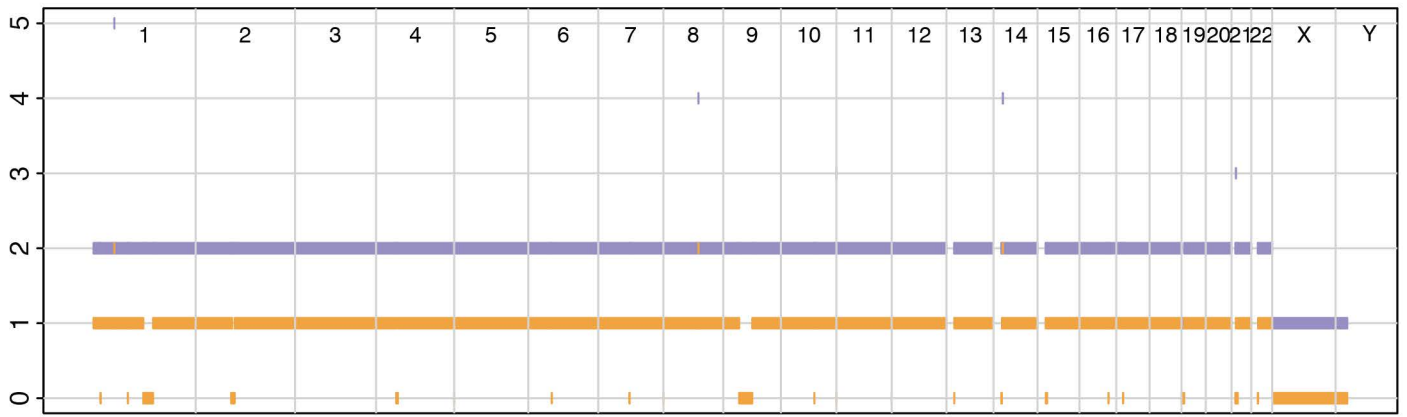

### PD7521

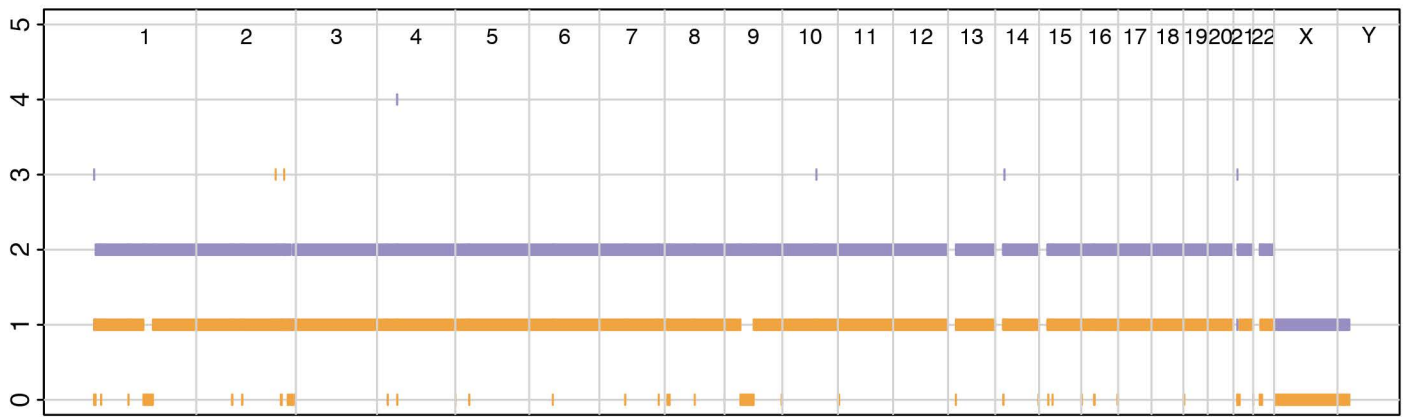

### PD7525

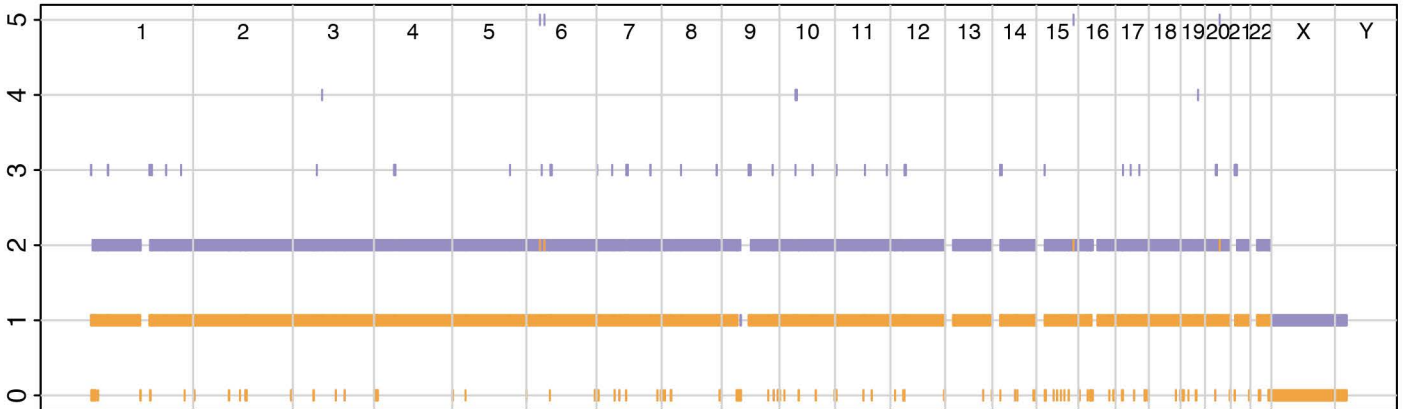

**b** PD13480

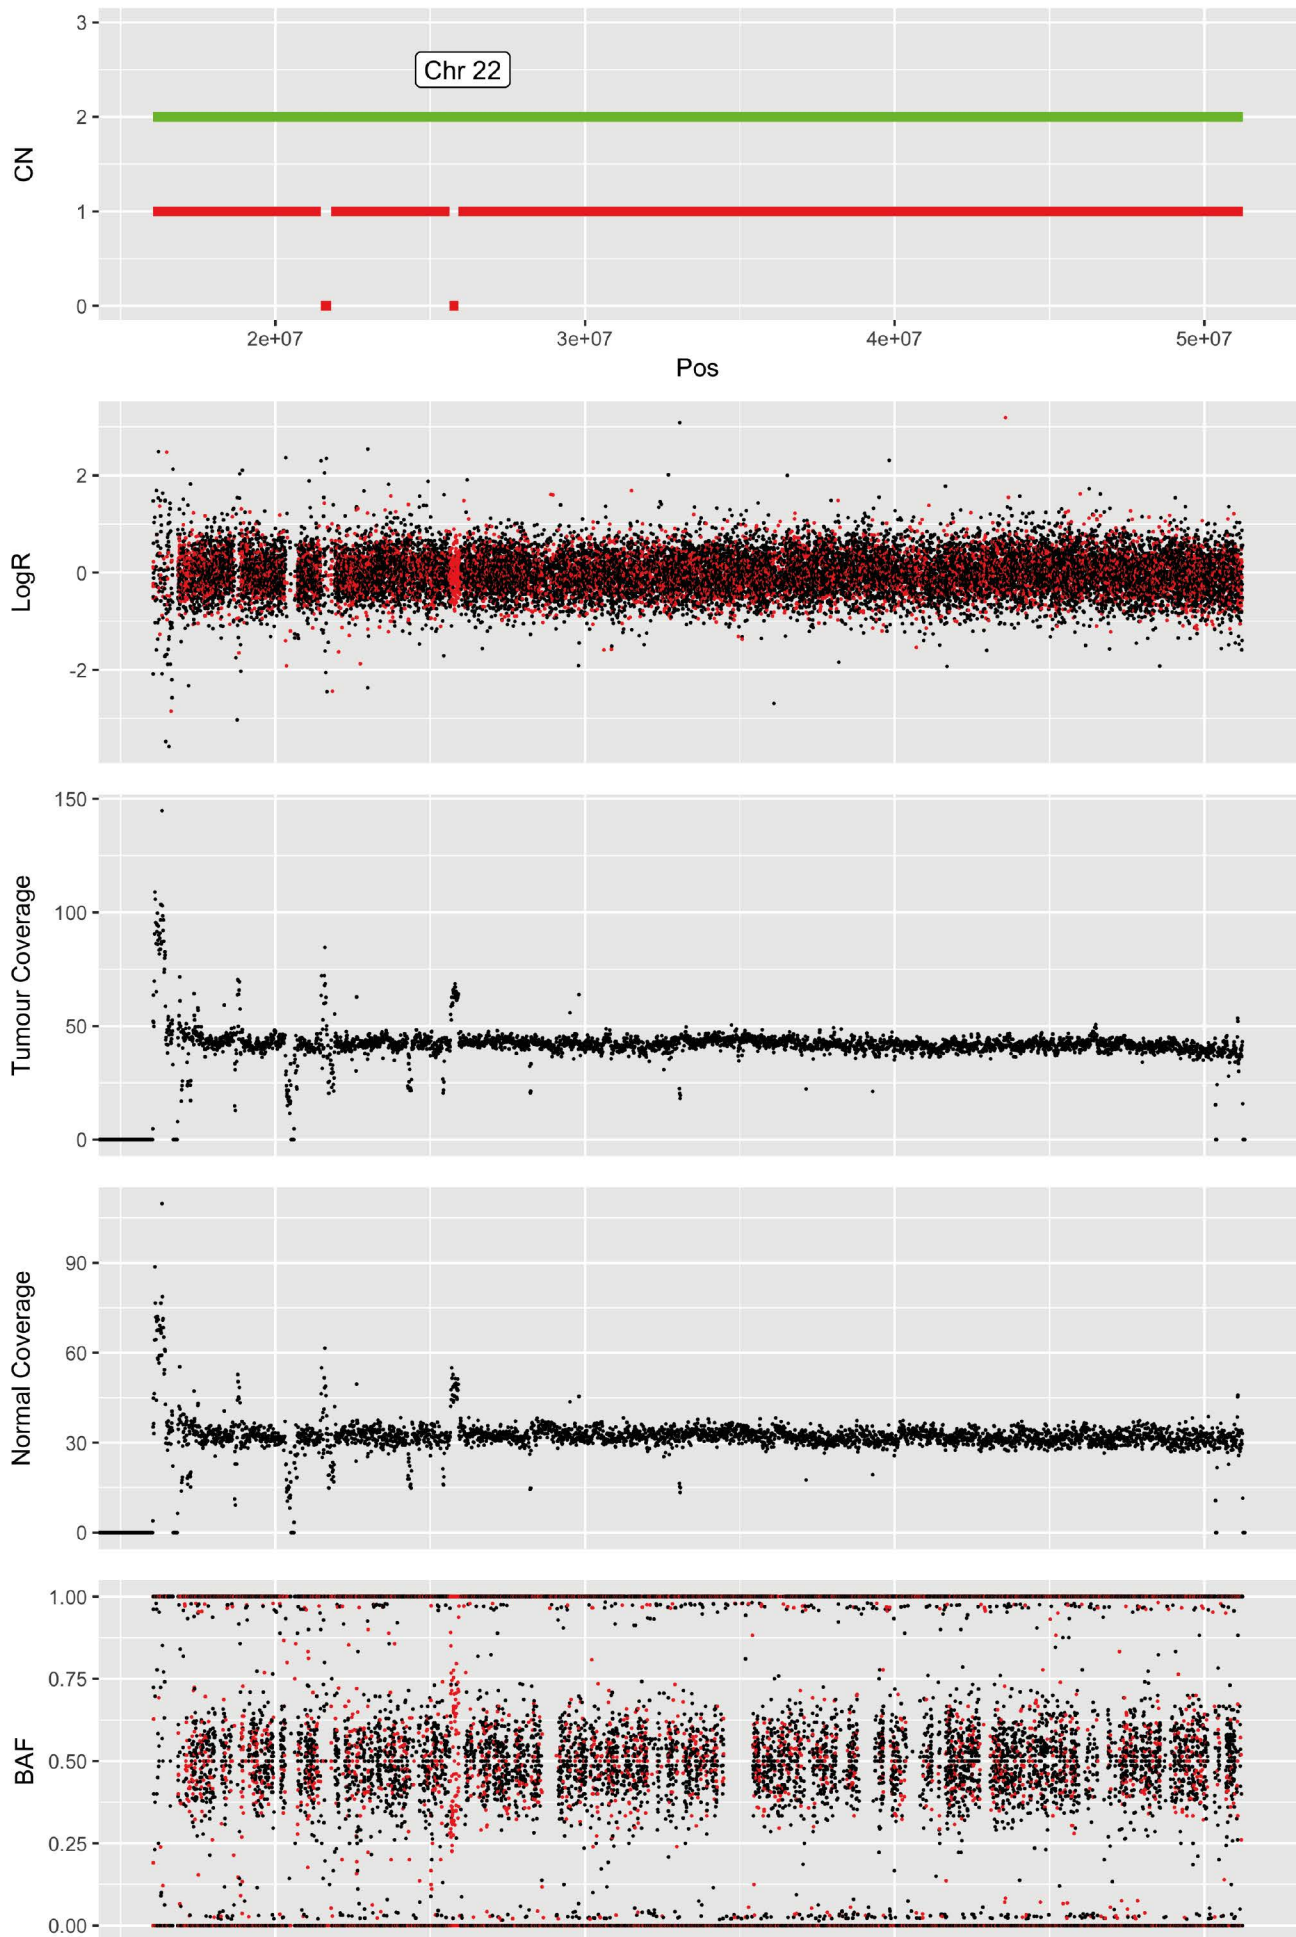

PD13481

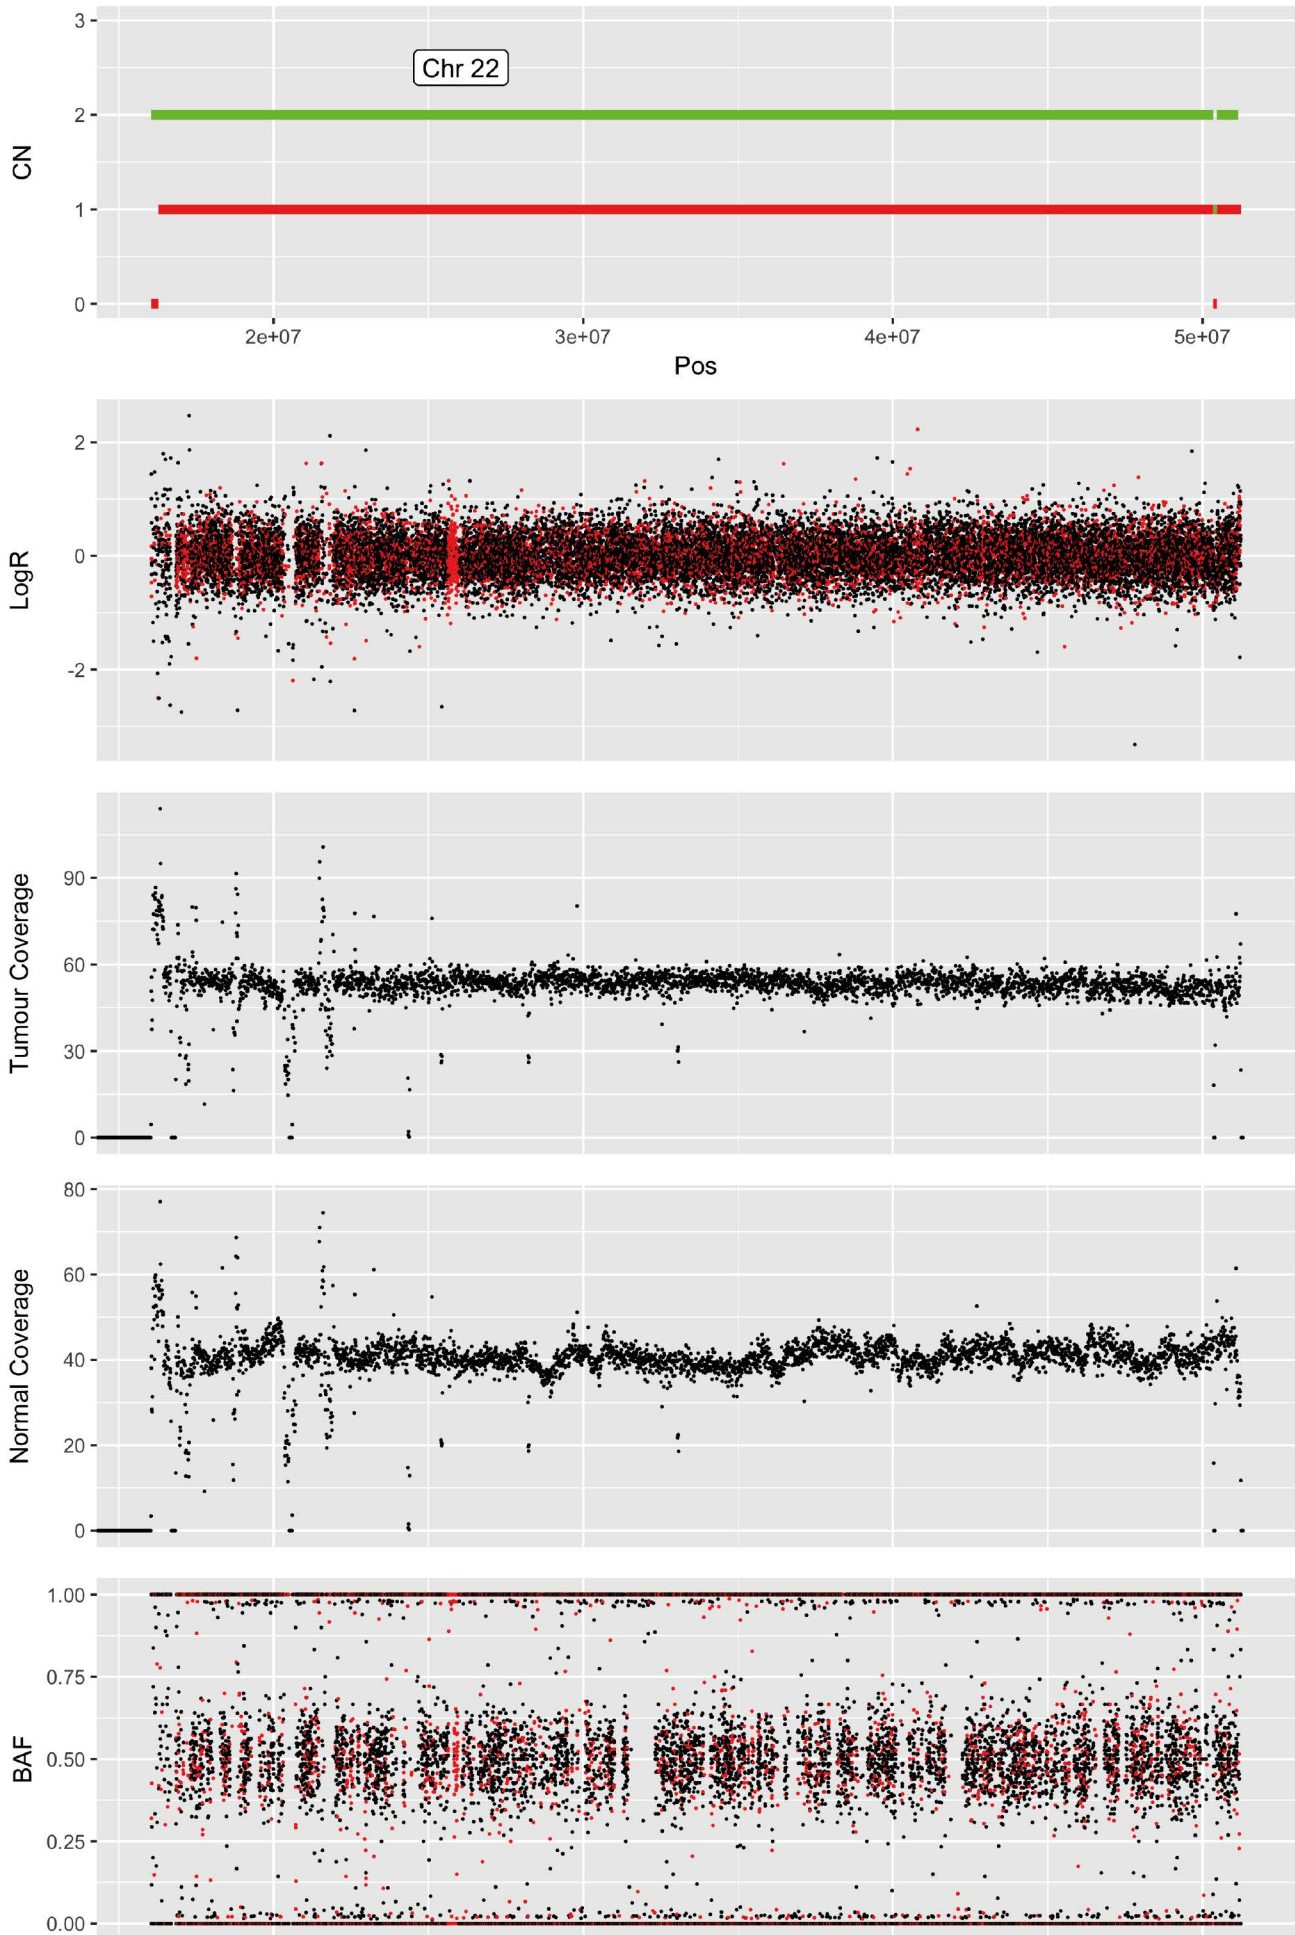

PD13482

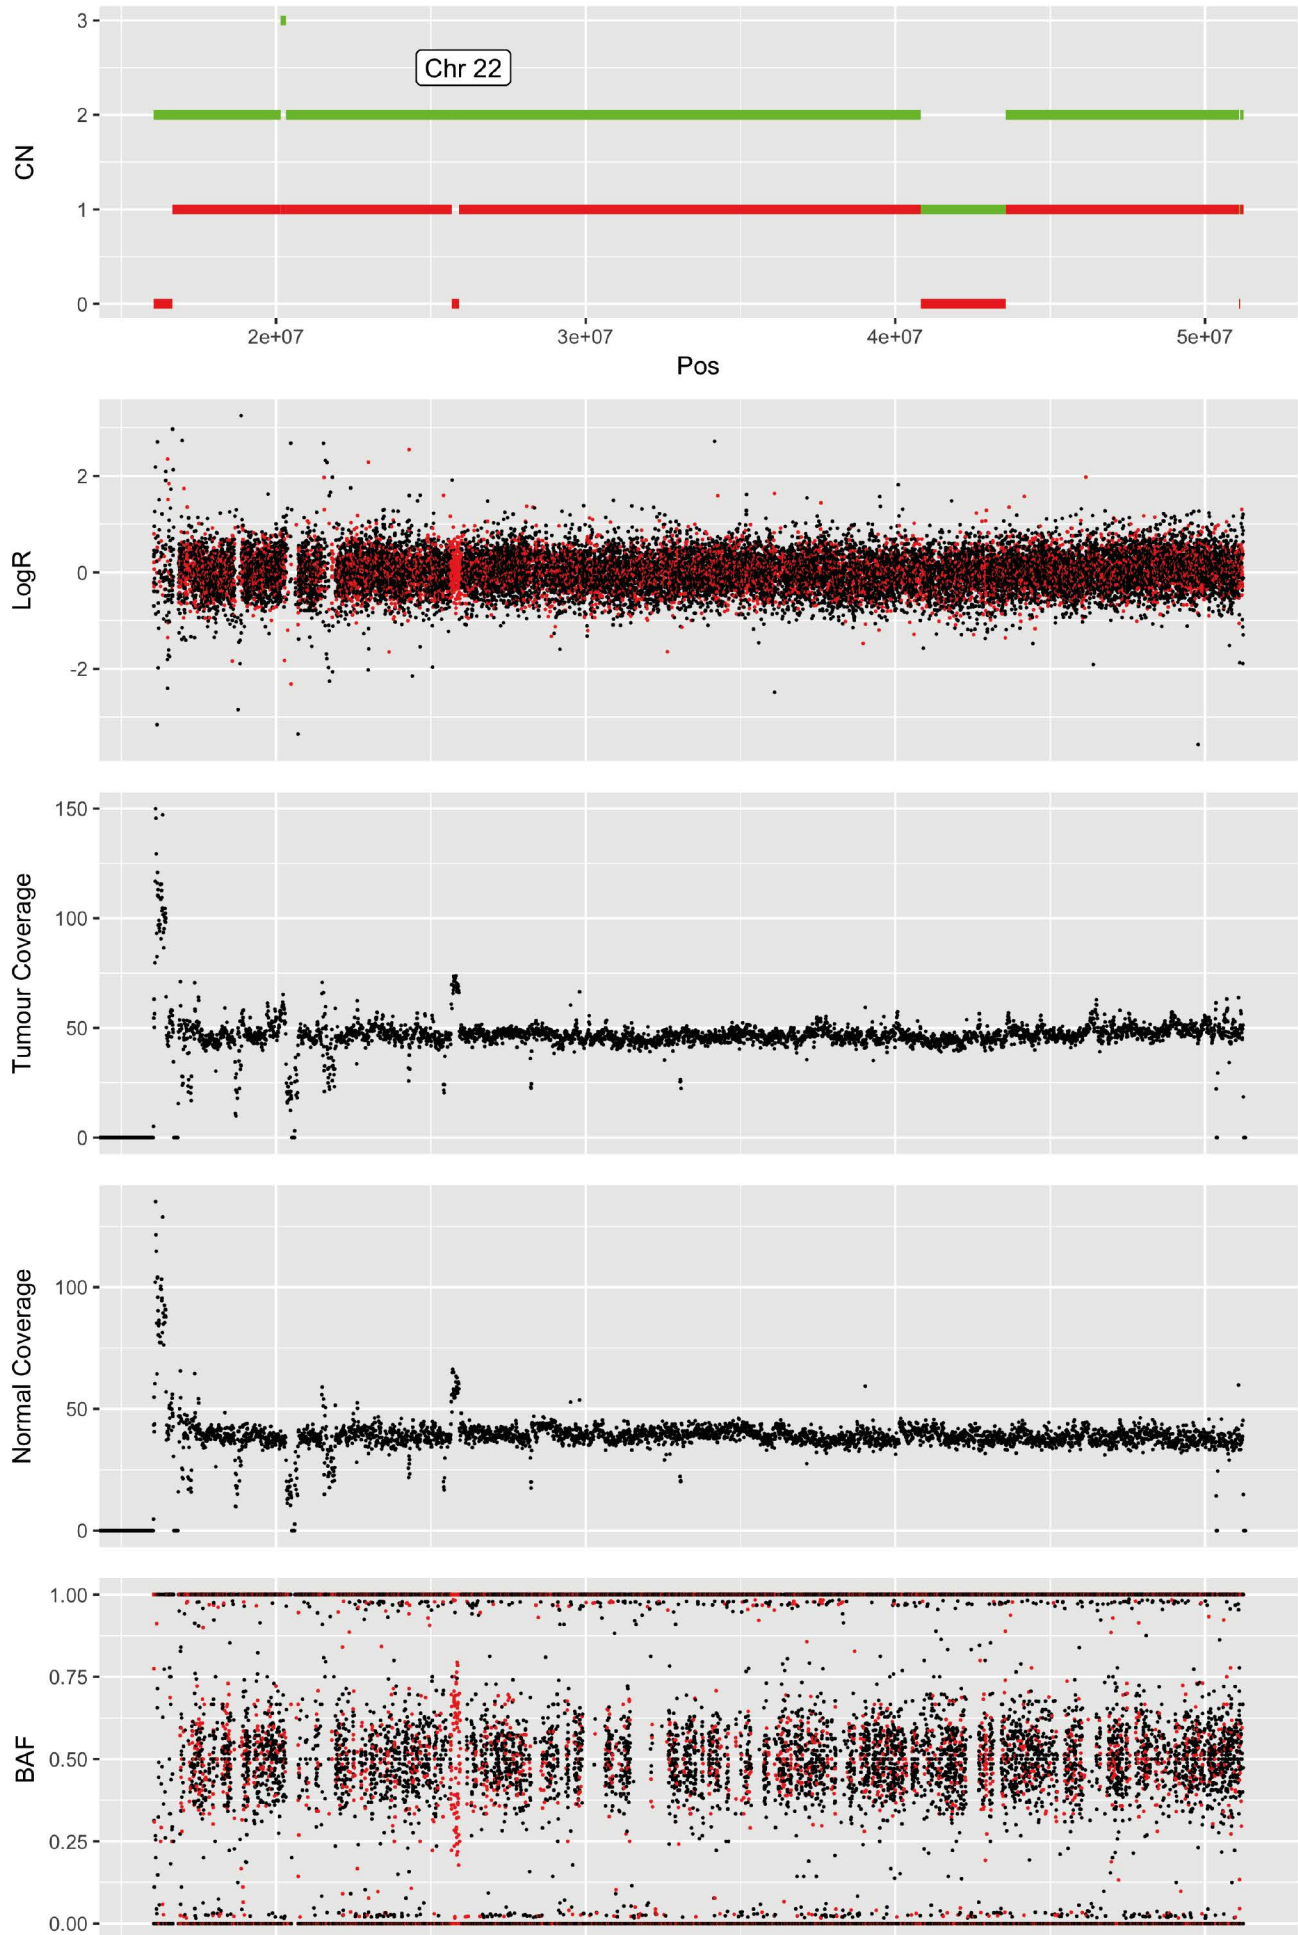

PD7519

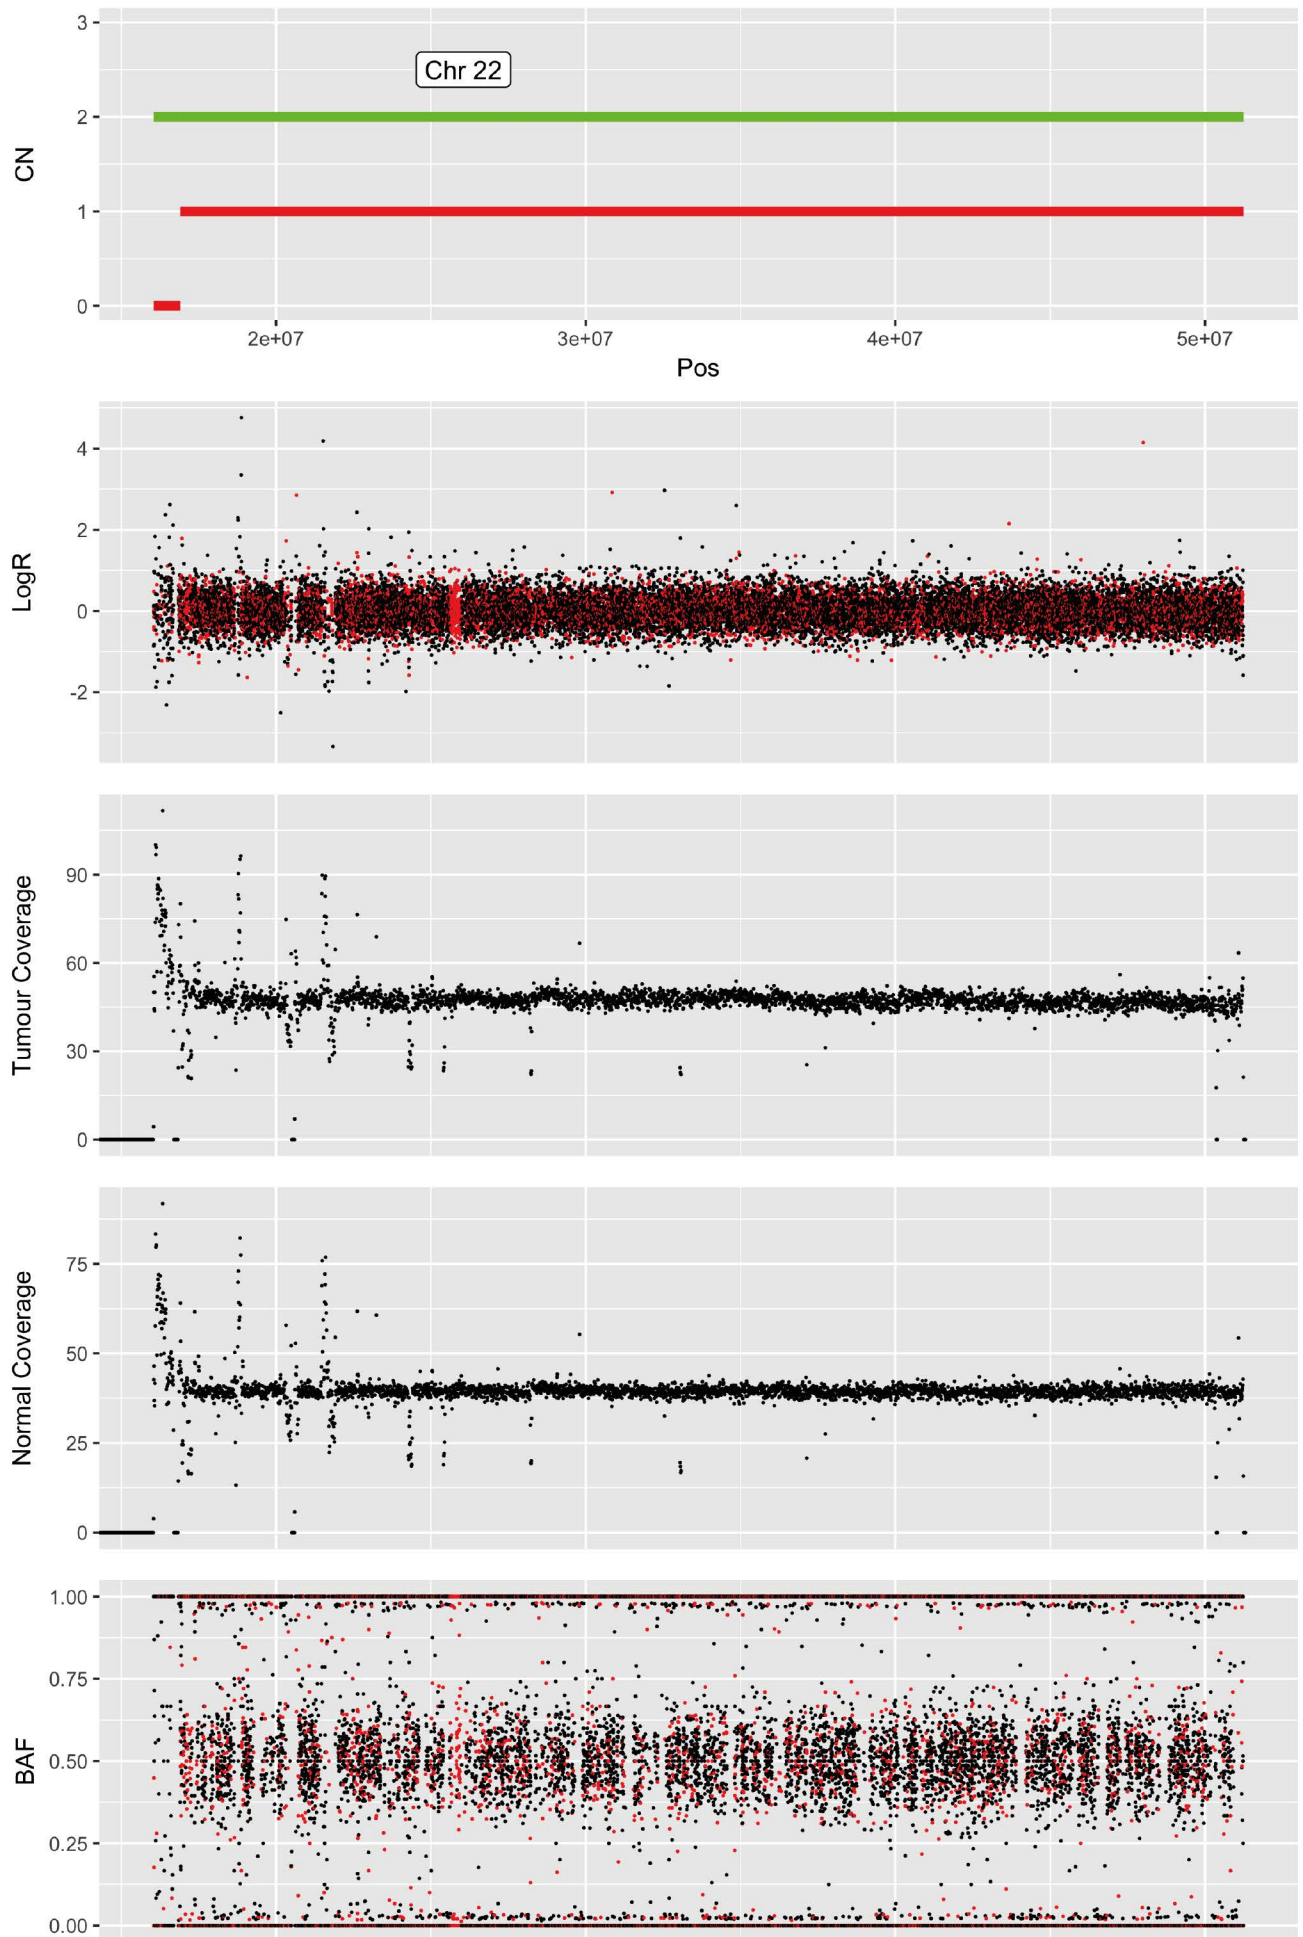

PD7521

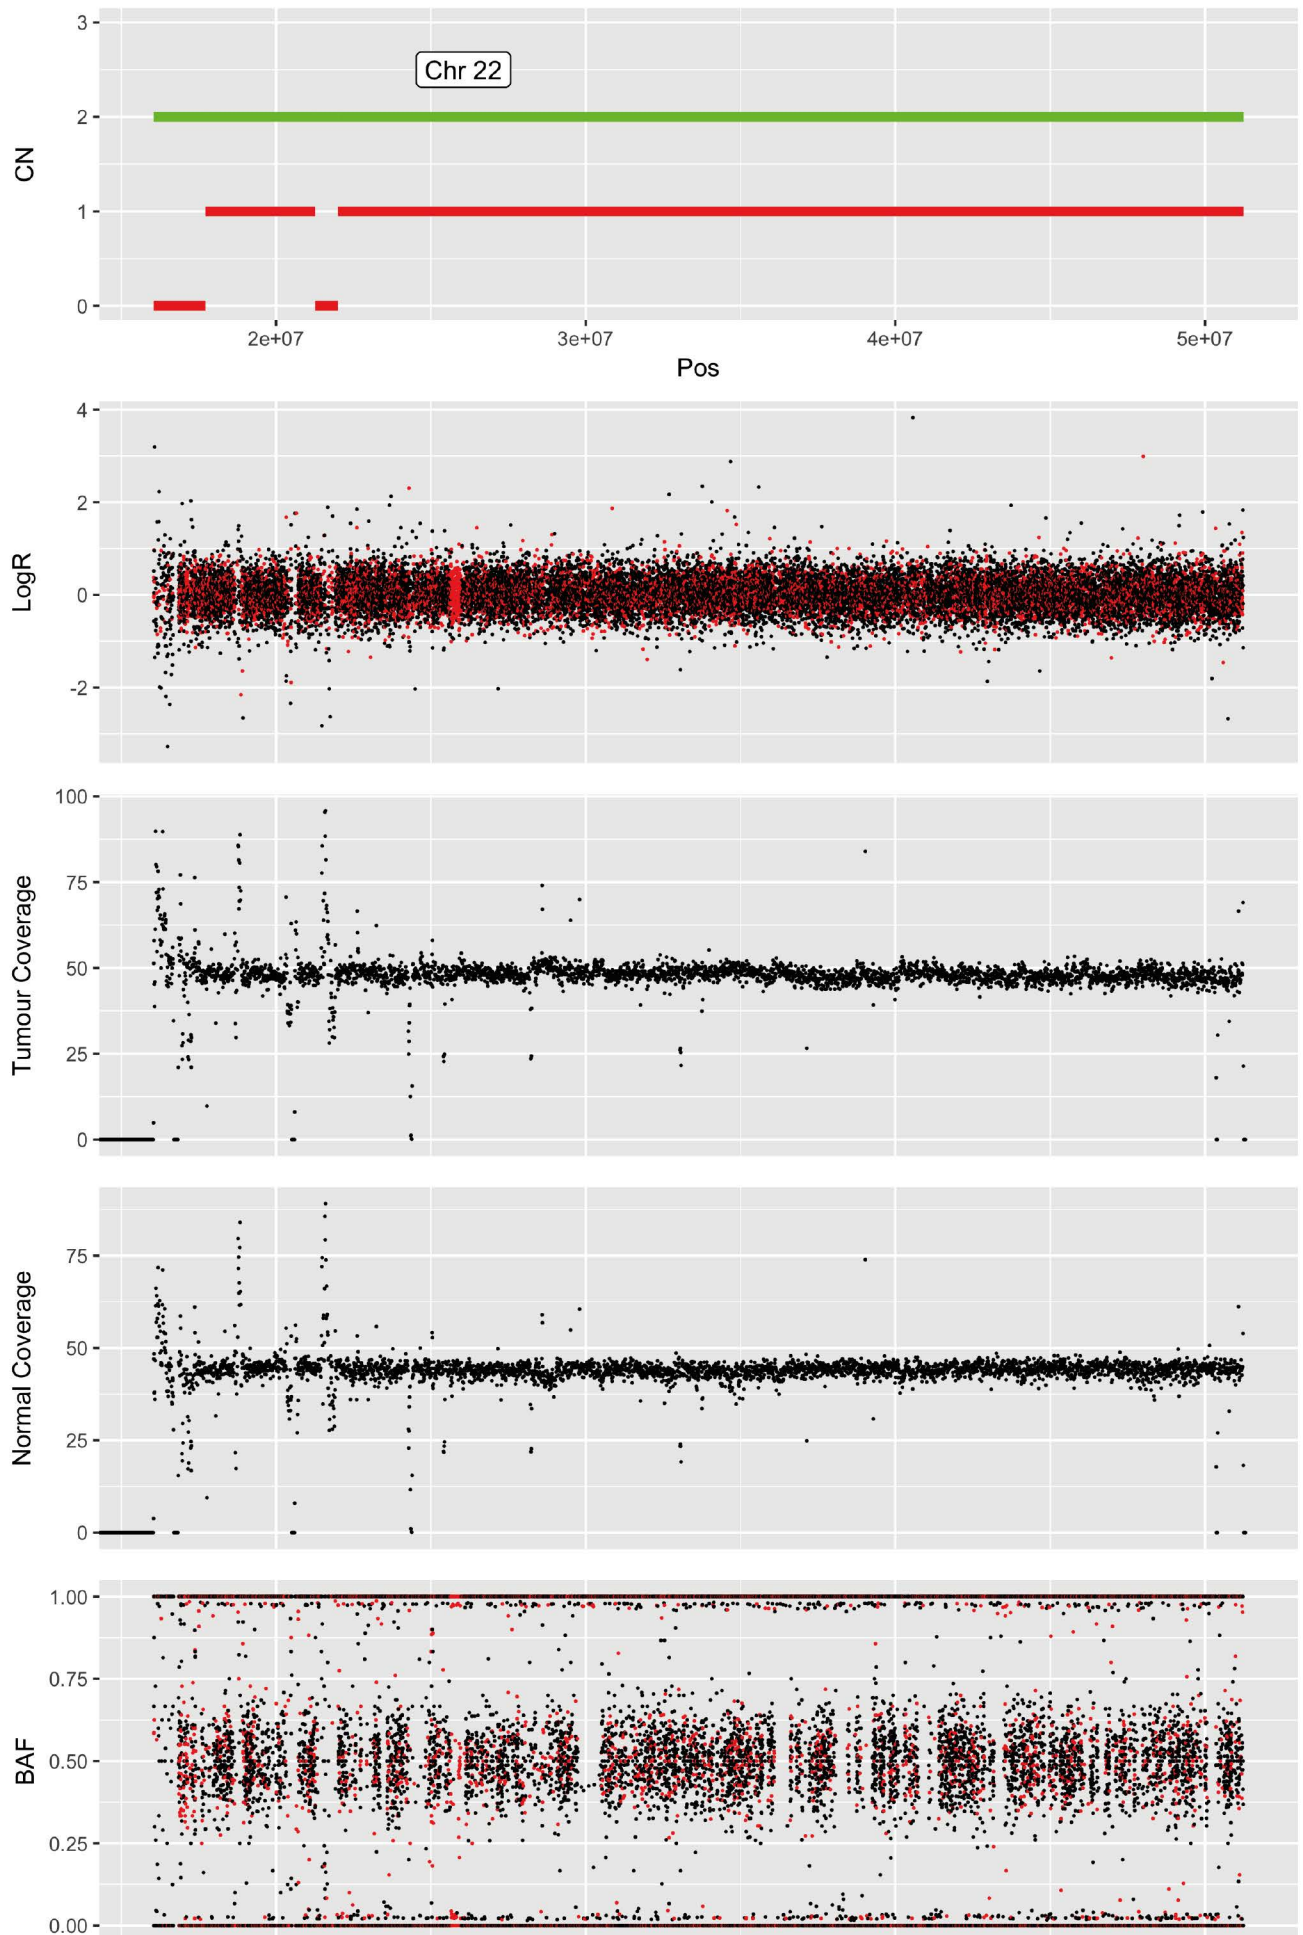



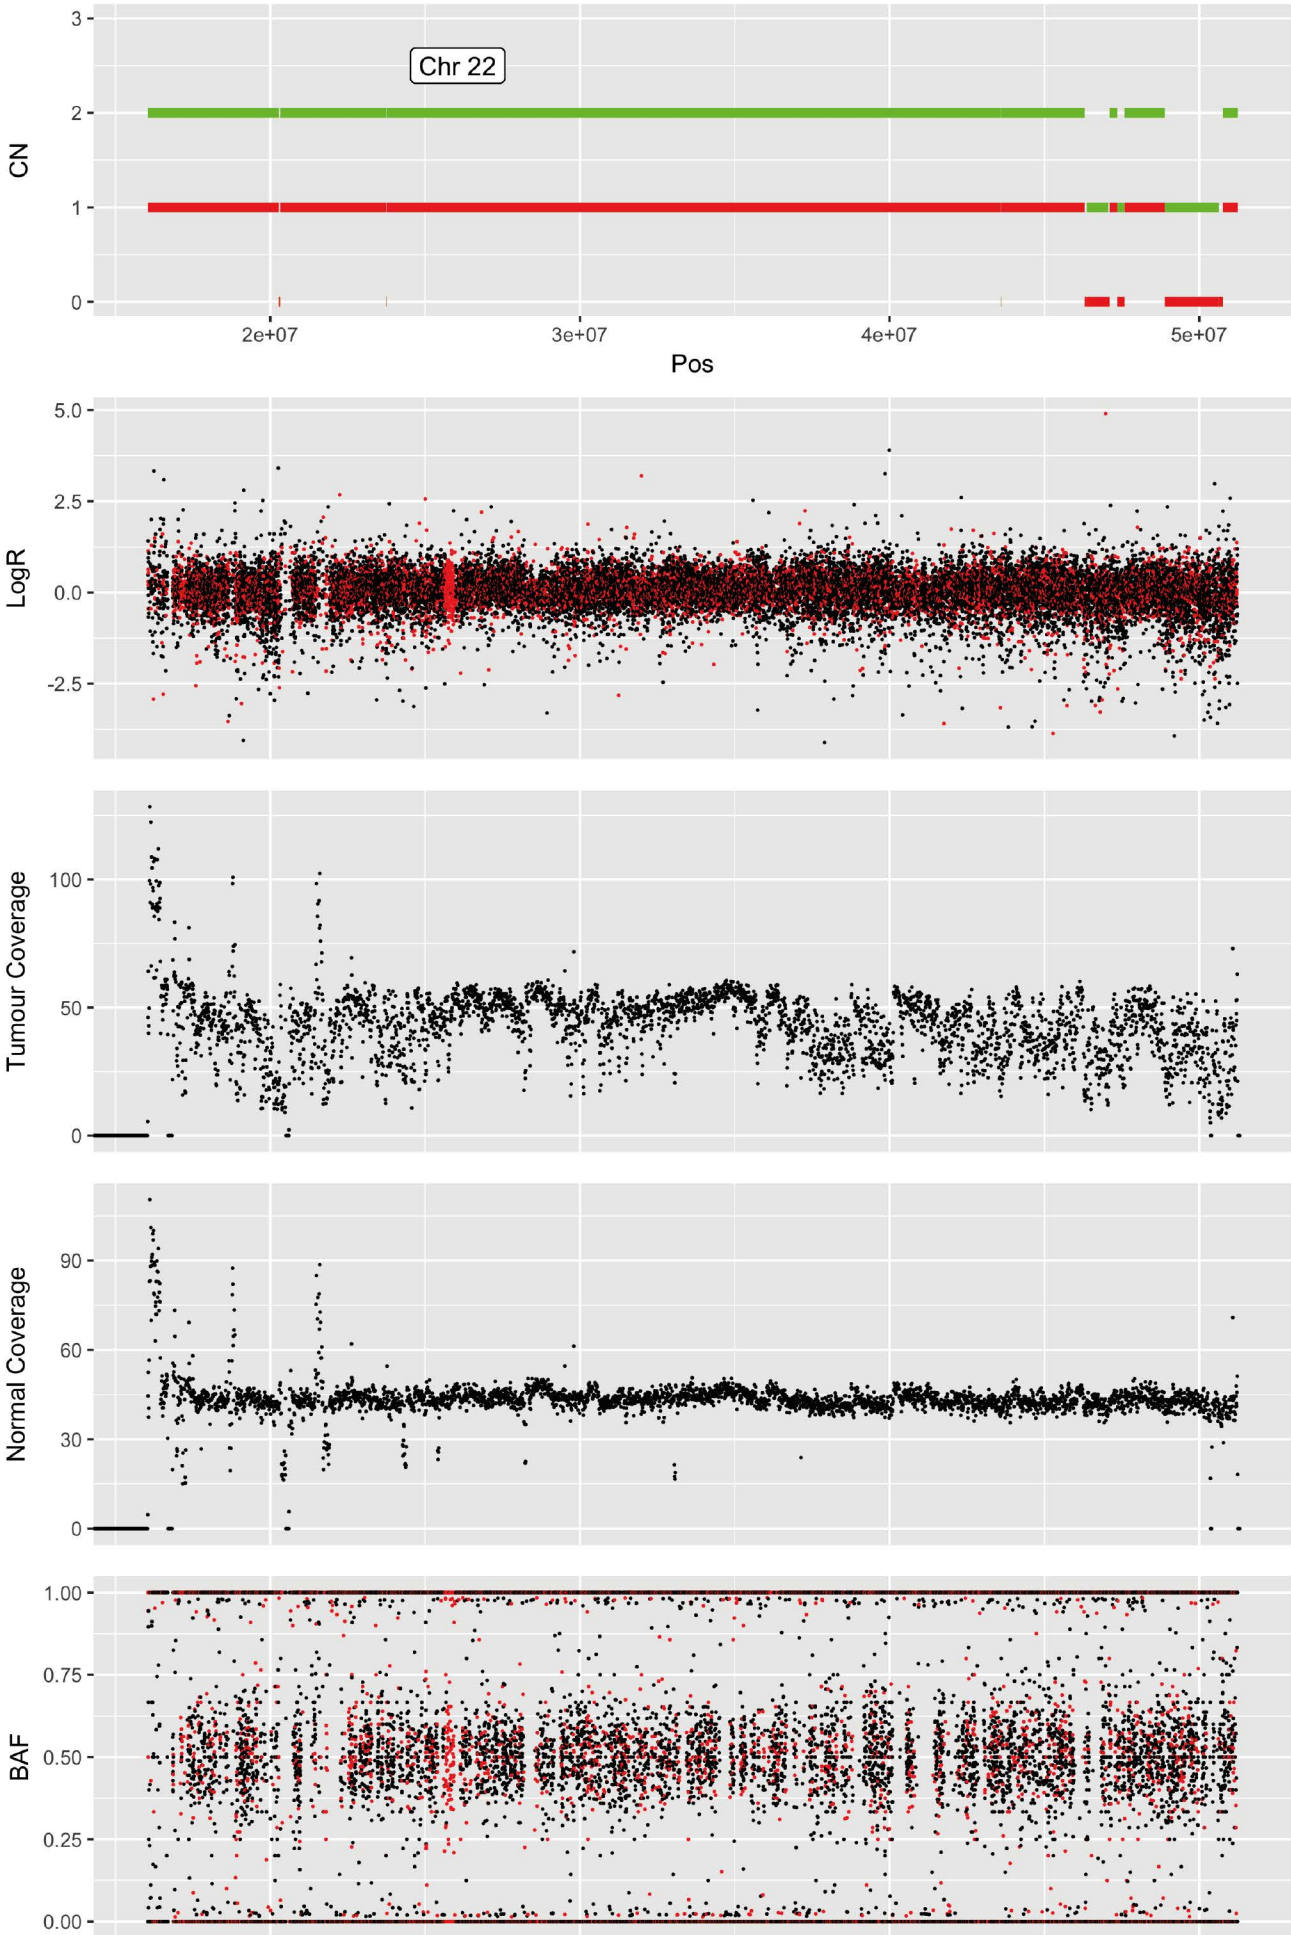

## Supplementary Figure 2. Fusion sequences and Sanger sequencing validation of *FOS* fusions

Upper schematics show the cDNA sequence revealed from bulk sequencing reads with the predicted peptide sequence. Beneath is validation of the fusion sequence from Sanger sequencing across the (*FOS* fusions only).

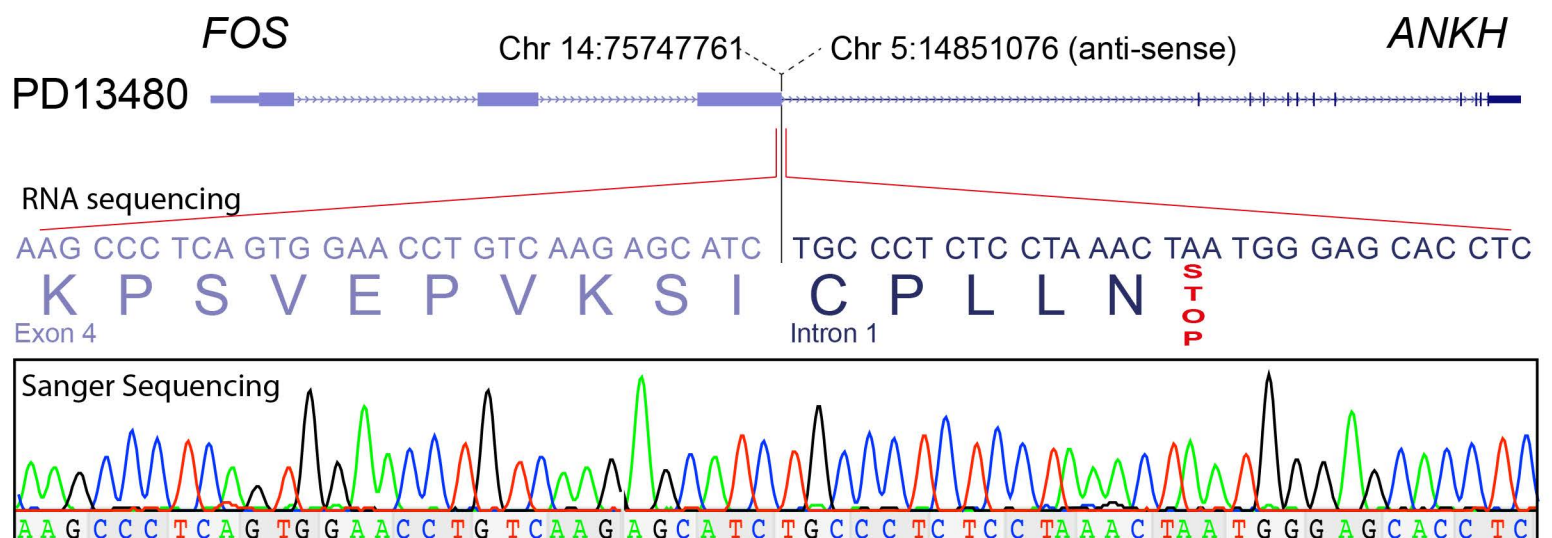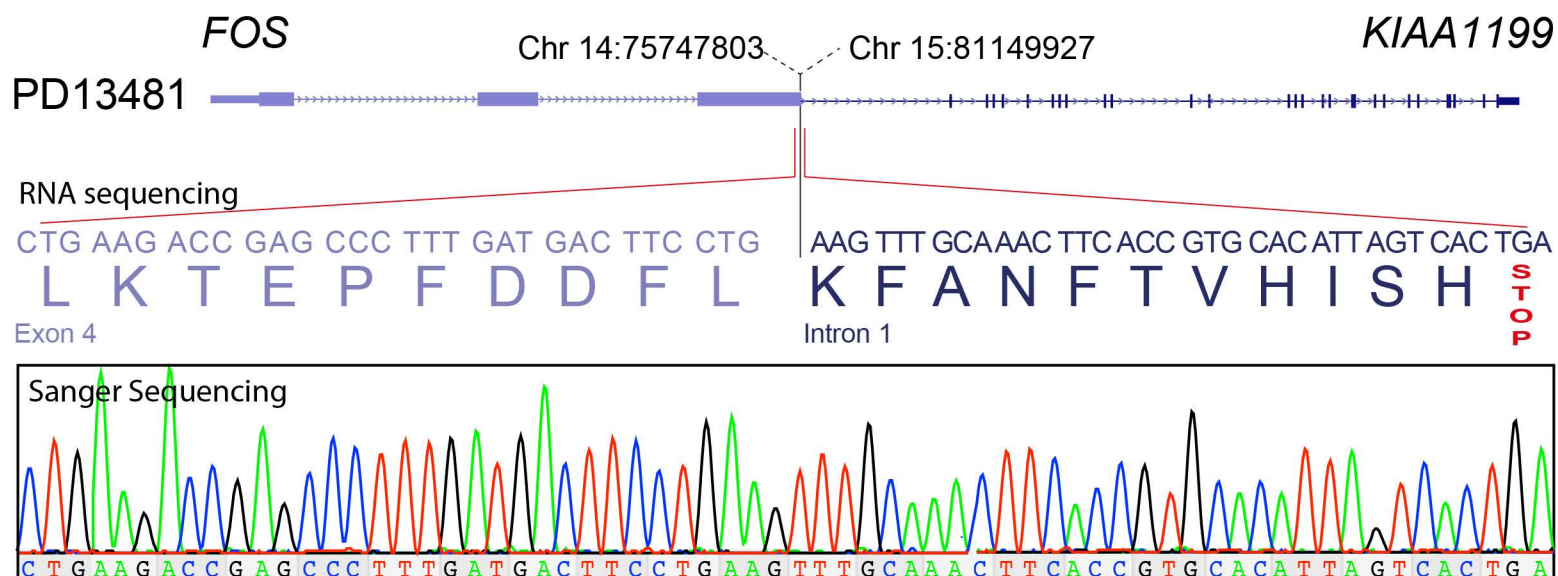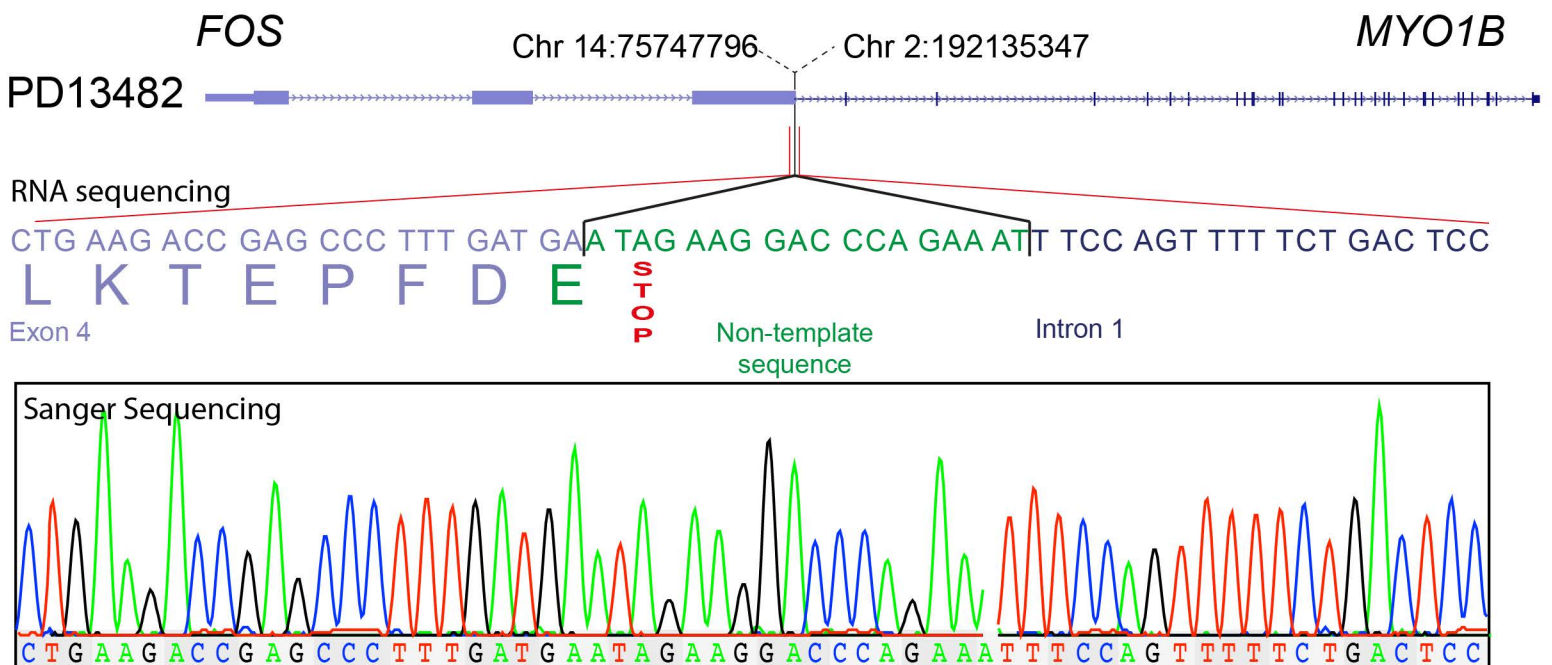

*FOS*

Chr 14:75747751

Chr 14:53309710(anti-sense)

*IGR*

PD7519

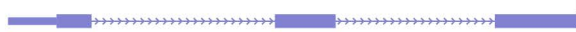

RNA sequencing

GAC CCT GAG CCC AAG CCC TCA GTG GAA CCT GTG TAA TGG AAA GTA GAA ACT CCA GCT TCC  
D P E P K P S V E P V STOP

Exon 4

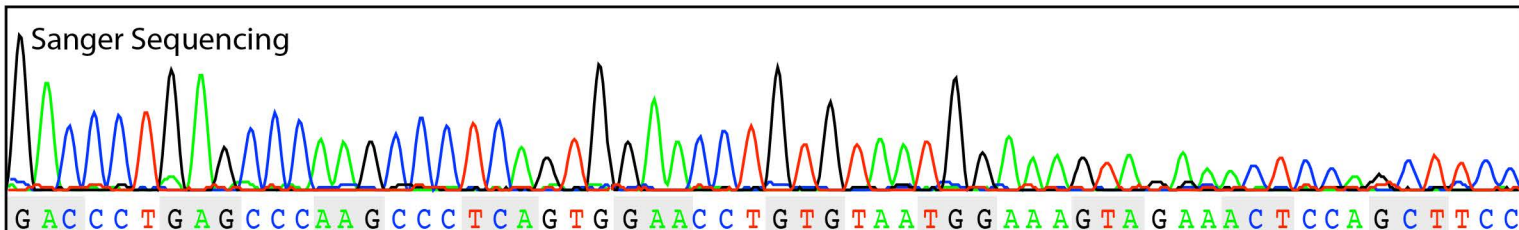

*FOS*

Chr 14:75747850

Chr 14:53477093

*IGR*

PD7521

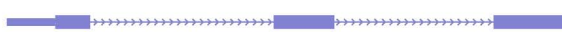

RNA sequencing

AGT GGC TCT GAG ACA GCC CGC TCC GT A GAT ATT TCG TCA GTT TTC AAG GTT GTT TAG AAA AAC  
S G S E T A R S V D I S S V F K V V STOP

Exon 4

Non-template sequence

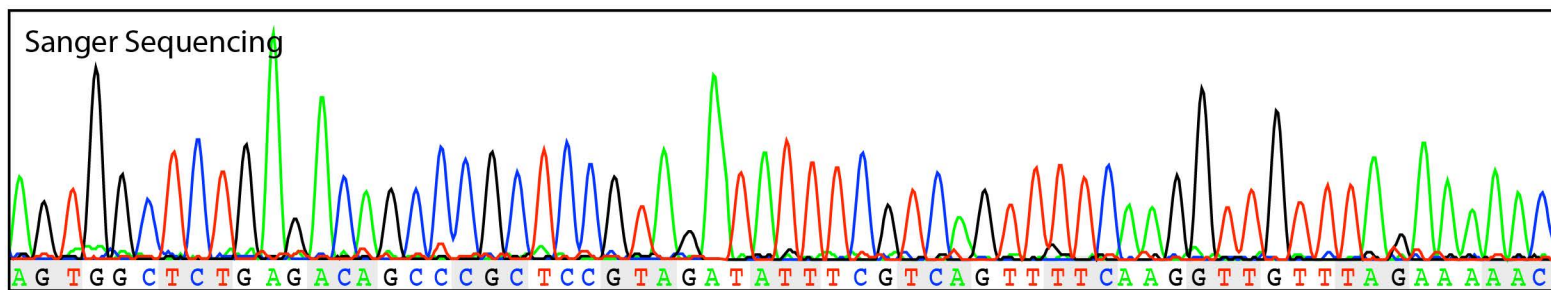

*FOSB*

*PPP1R10*

Chr 6:30571219

Chr 19:45971907

PD7525

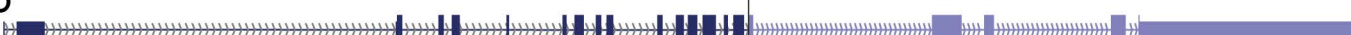

RNA sequencing

TCC ATC ATG GTA CGC ACC CTC CTT CCC CTT TTC CAC CTT CTCTGC GAG TCT CAA TAT CTG TCT TCG GTG GAC TCC  
S I M V R T L L P L F H L L C E S Q Y L S S V D S

Exon 16

Intron 16

*PPP1R10*

Non-template sequence *FOSB*

### Supplementary Figure 3. RNA sequencing coverage and allelic imbalance for *FOS* and *FOSB*

Plots show RNAseq coverage with exons shown as blue rectangles. Breakpoints are shown with red lines. Fusion partner coverage is shown for 1kb after the breakpoint (light blue). Heterozygous SNPs, as identified in DNA, relative counts are shown as stacked bars. a-e) *FOS* fusion cases, f) *FOSB* fusion. There is no clear evidence of allelic imbalance or fusion transcripts dominating wild-type transcripts. As tumour purity is low, it is likely that a significant proportion of RNAseq reads are contributed by normal contaminating cells. As these are not immunoreactive on *FOS* immunostaining (see panels above or PD7525 for *FOS* fusion negative sample), this strongly hints at predominantly post-transcriptionally effects of truncation. g) For this *FOSB* fusion case there is imbalance of an intron 1 heterozygous snp, suggesting increased transcriptional activity of one allele.

**a**

PD13480  
(FOS+ve)

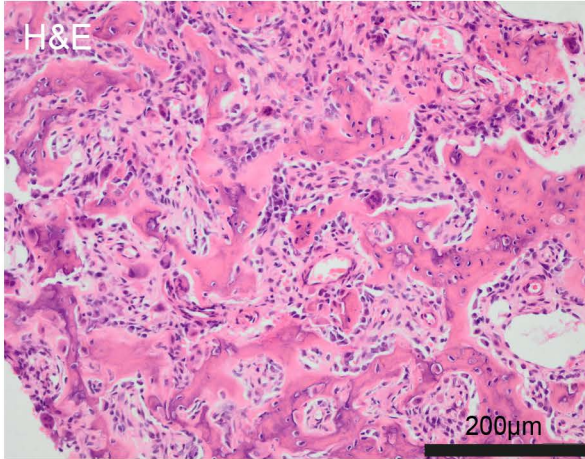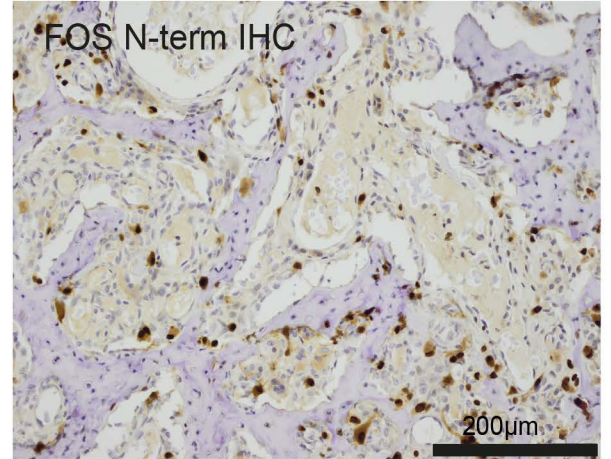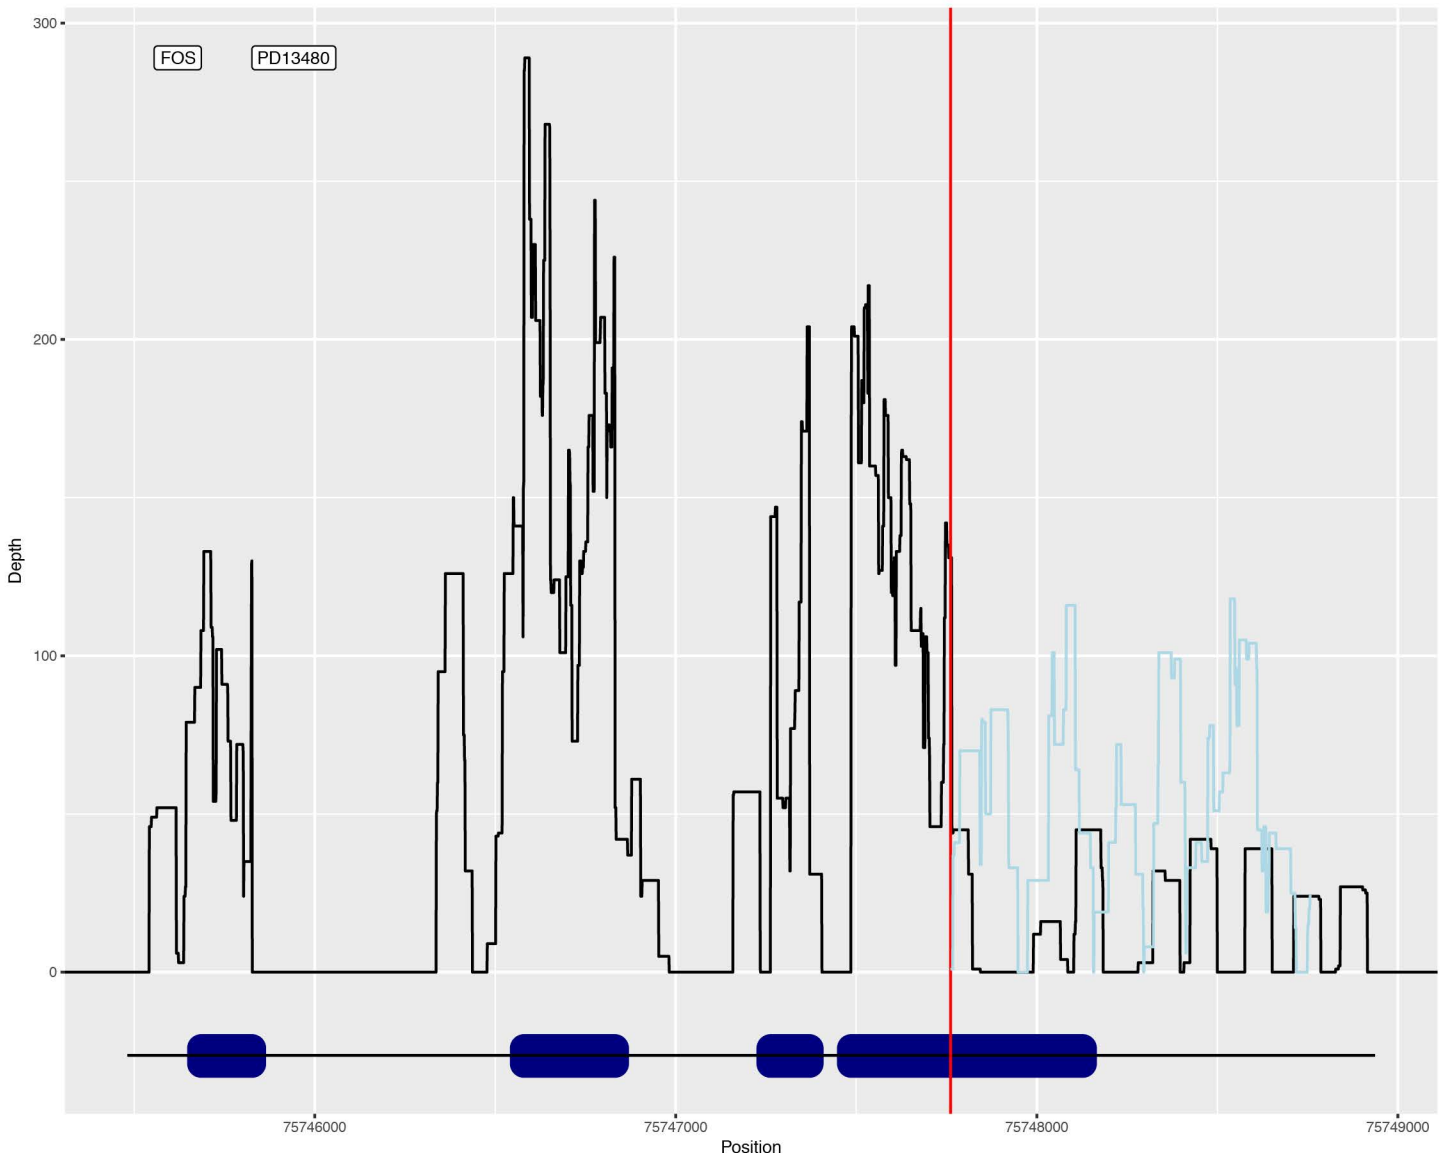

**b**

PD13481  
(FOS+ve)

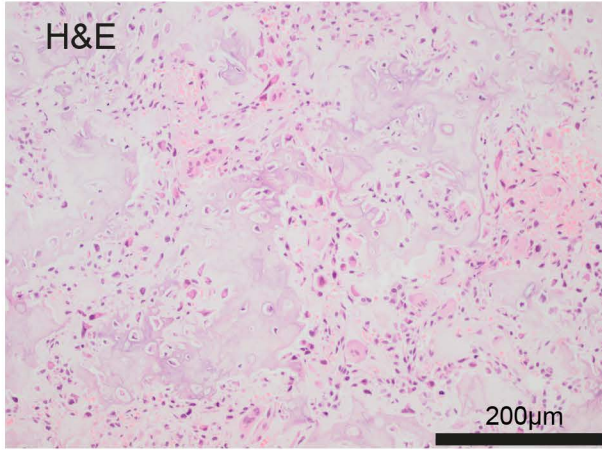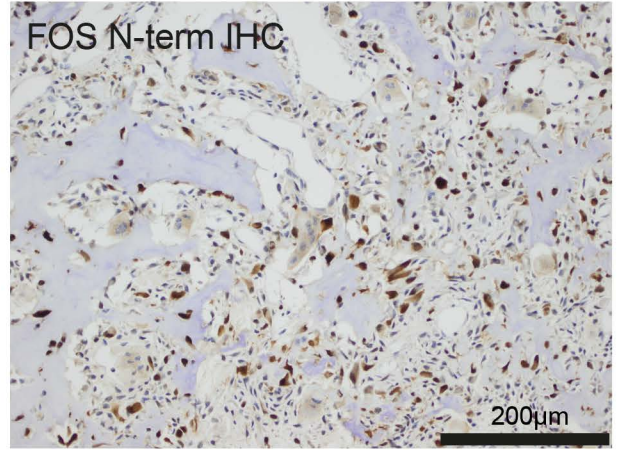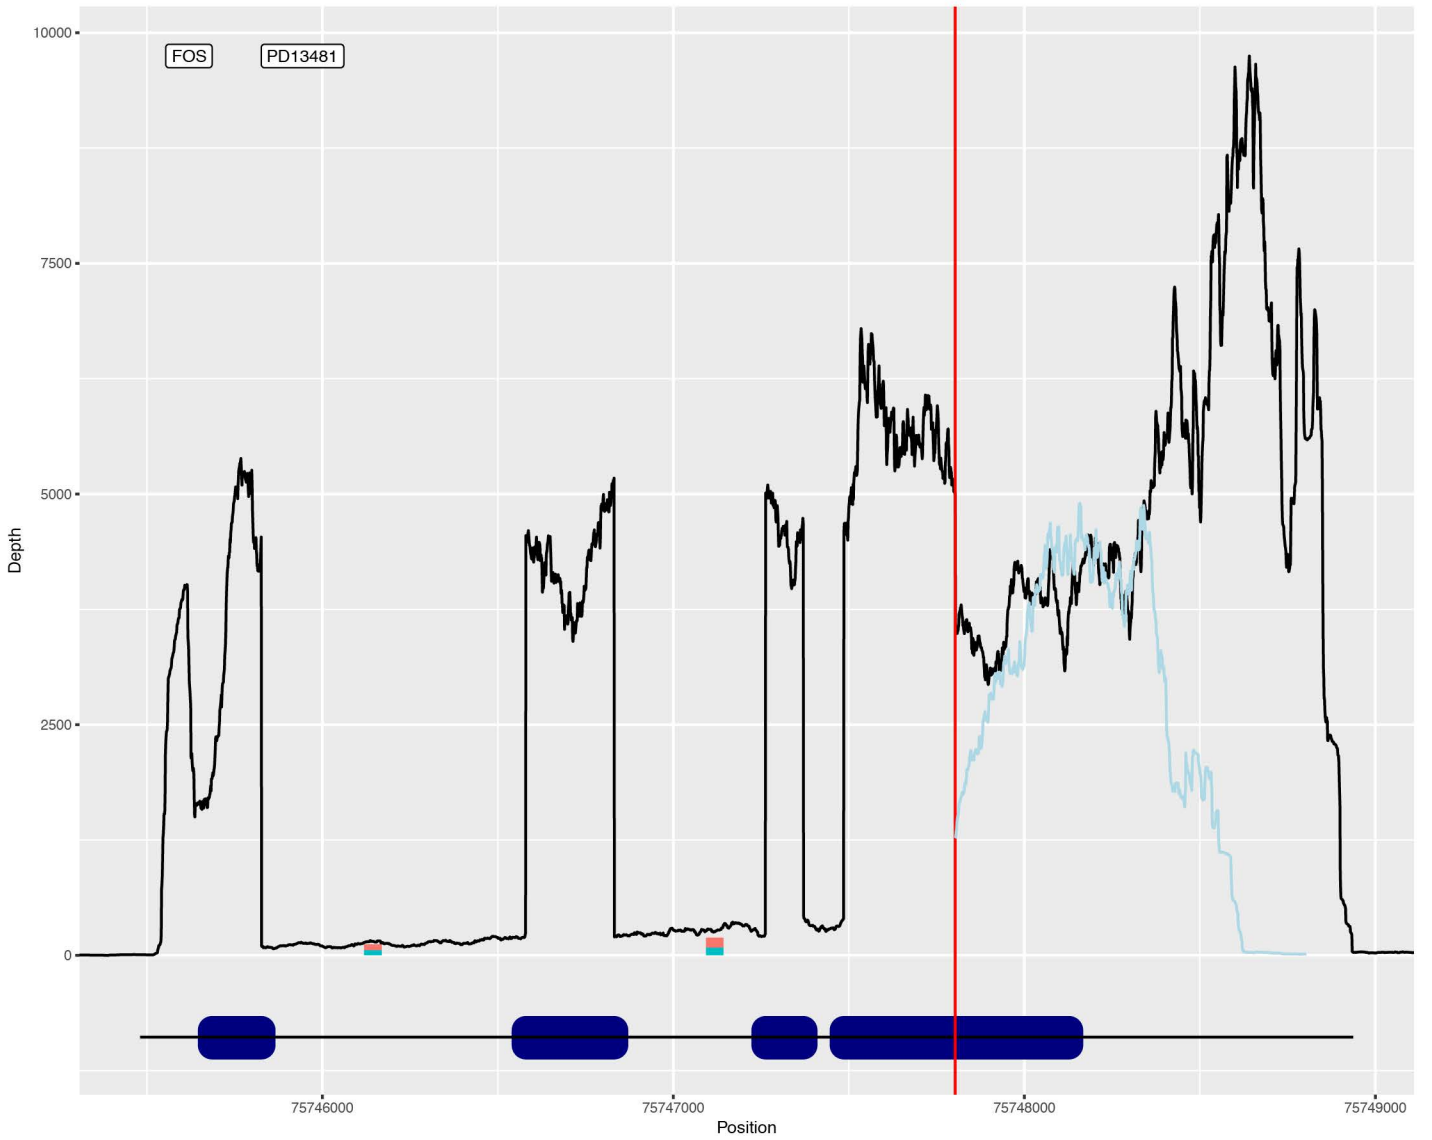

**C**

PD13482  
(FOS+ve)

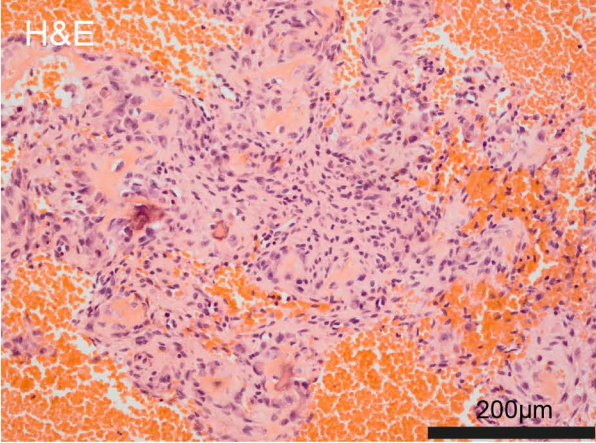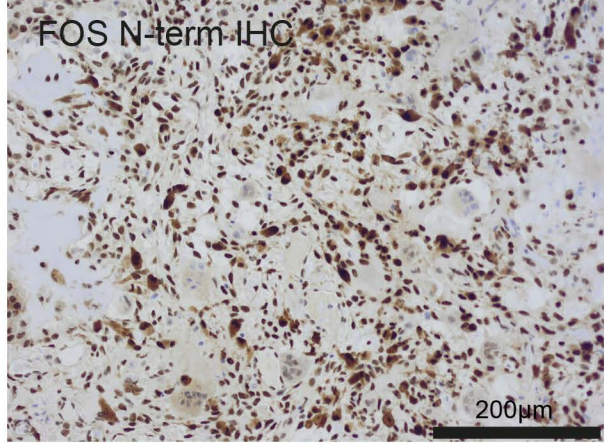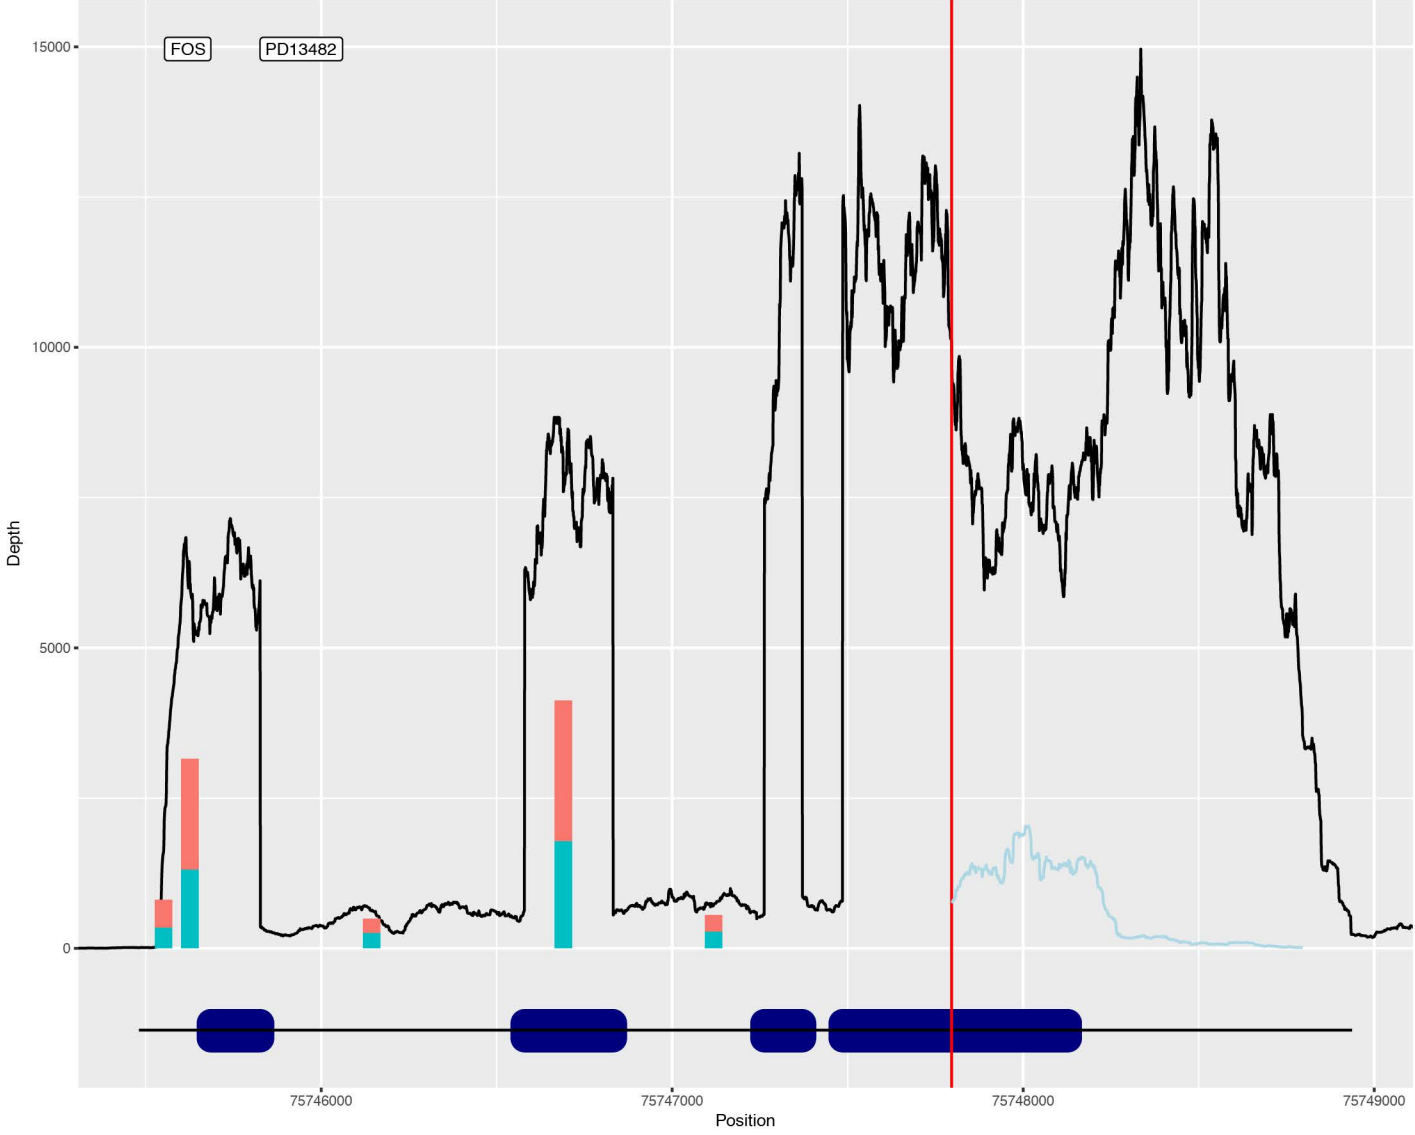

**d**

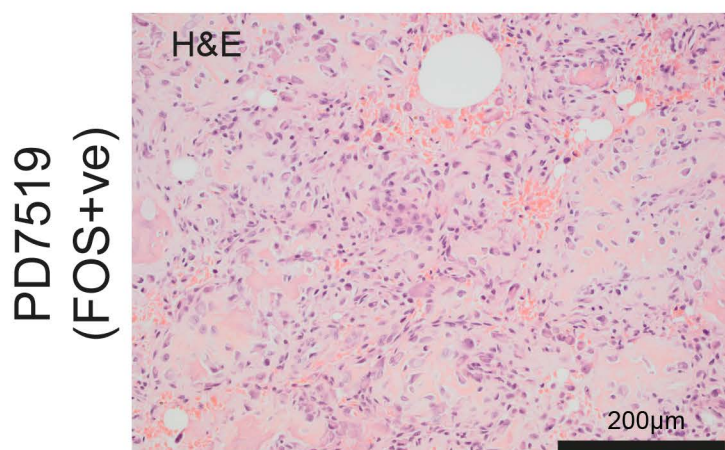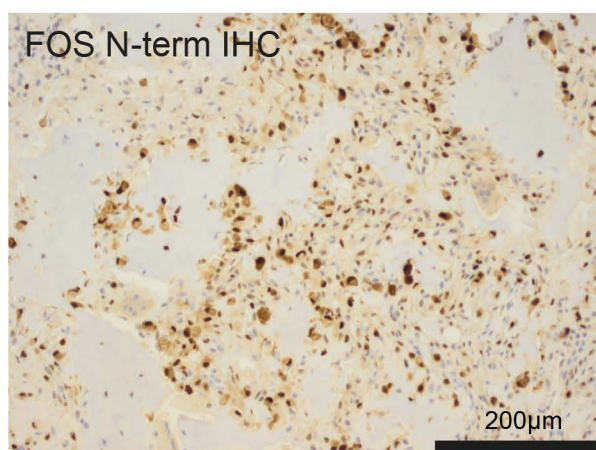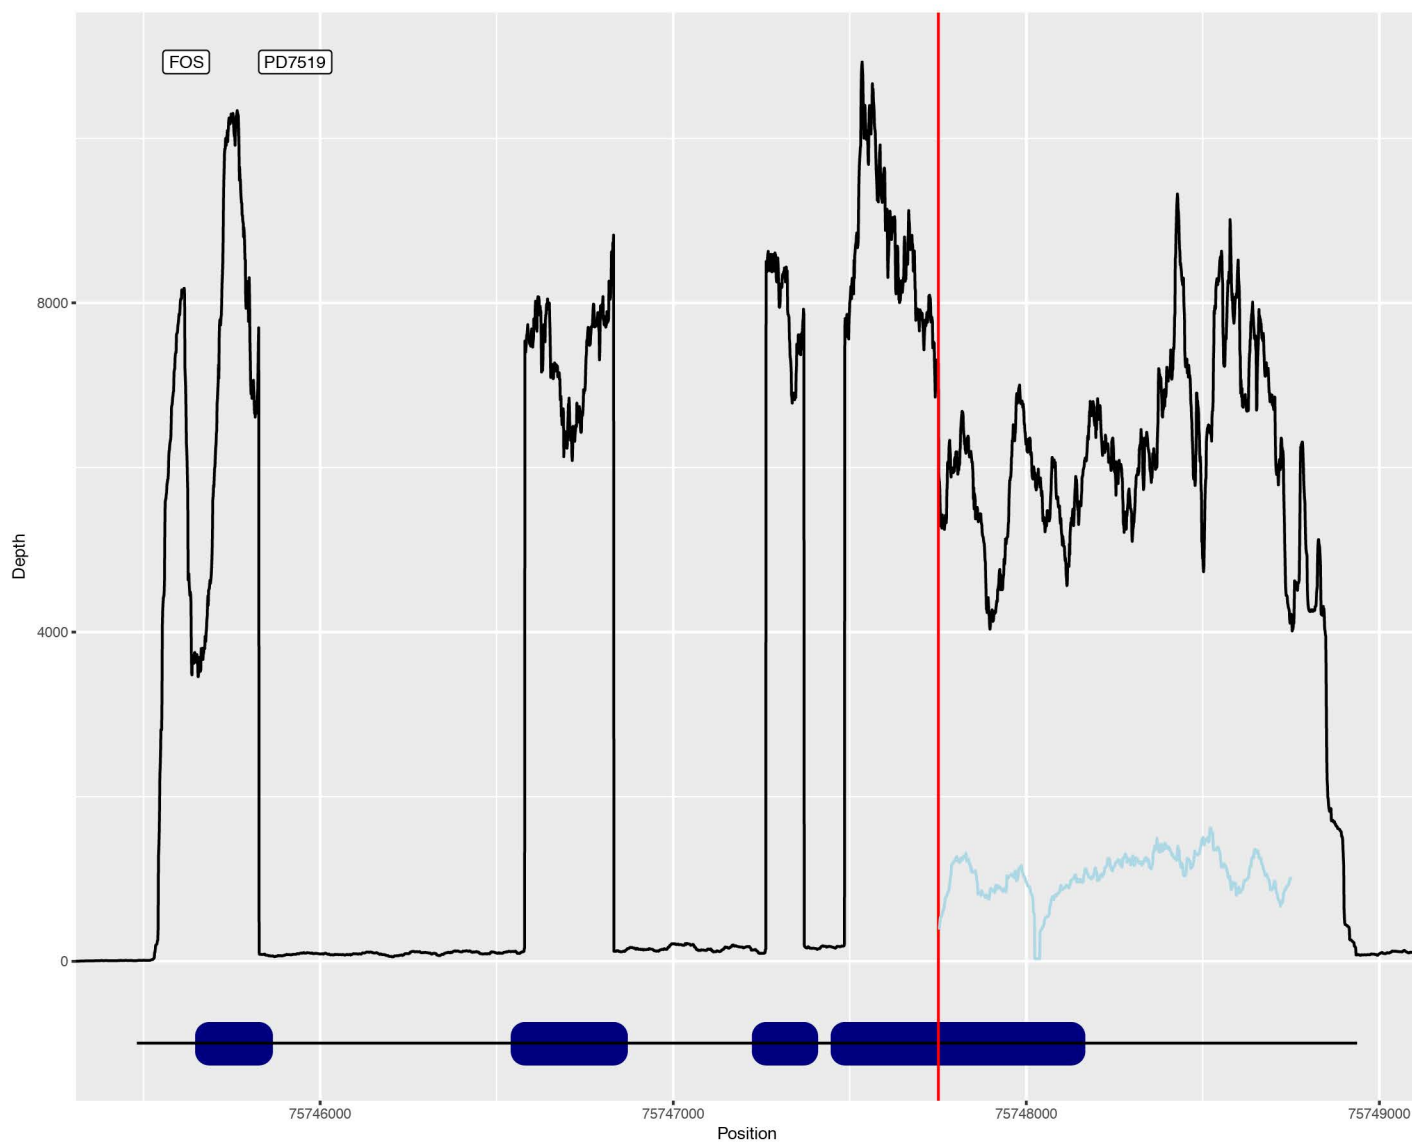

**e**

PD7521  
(FOS+ve)

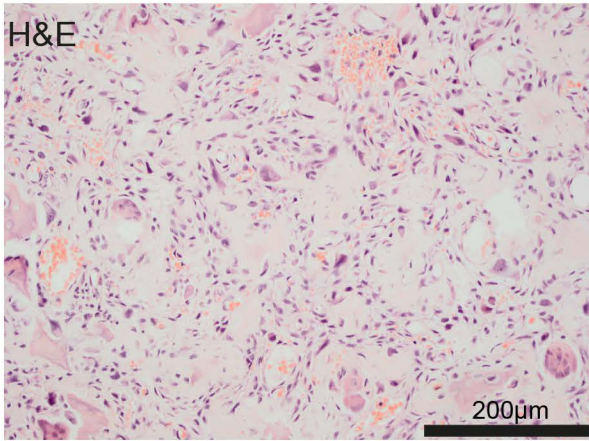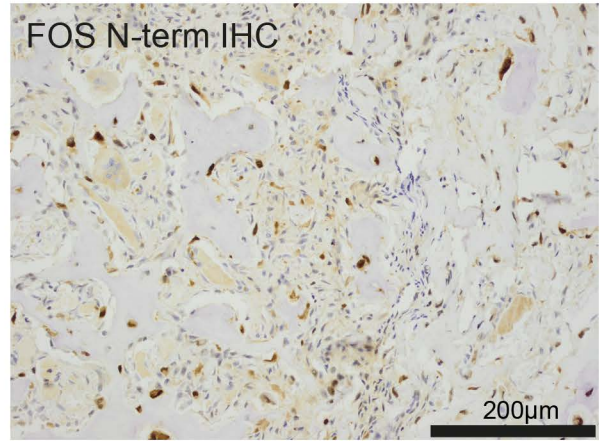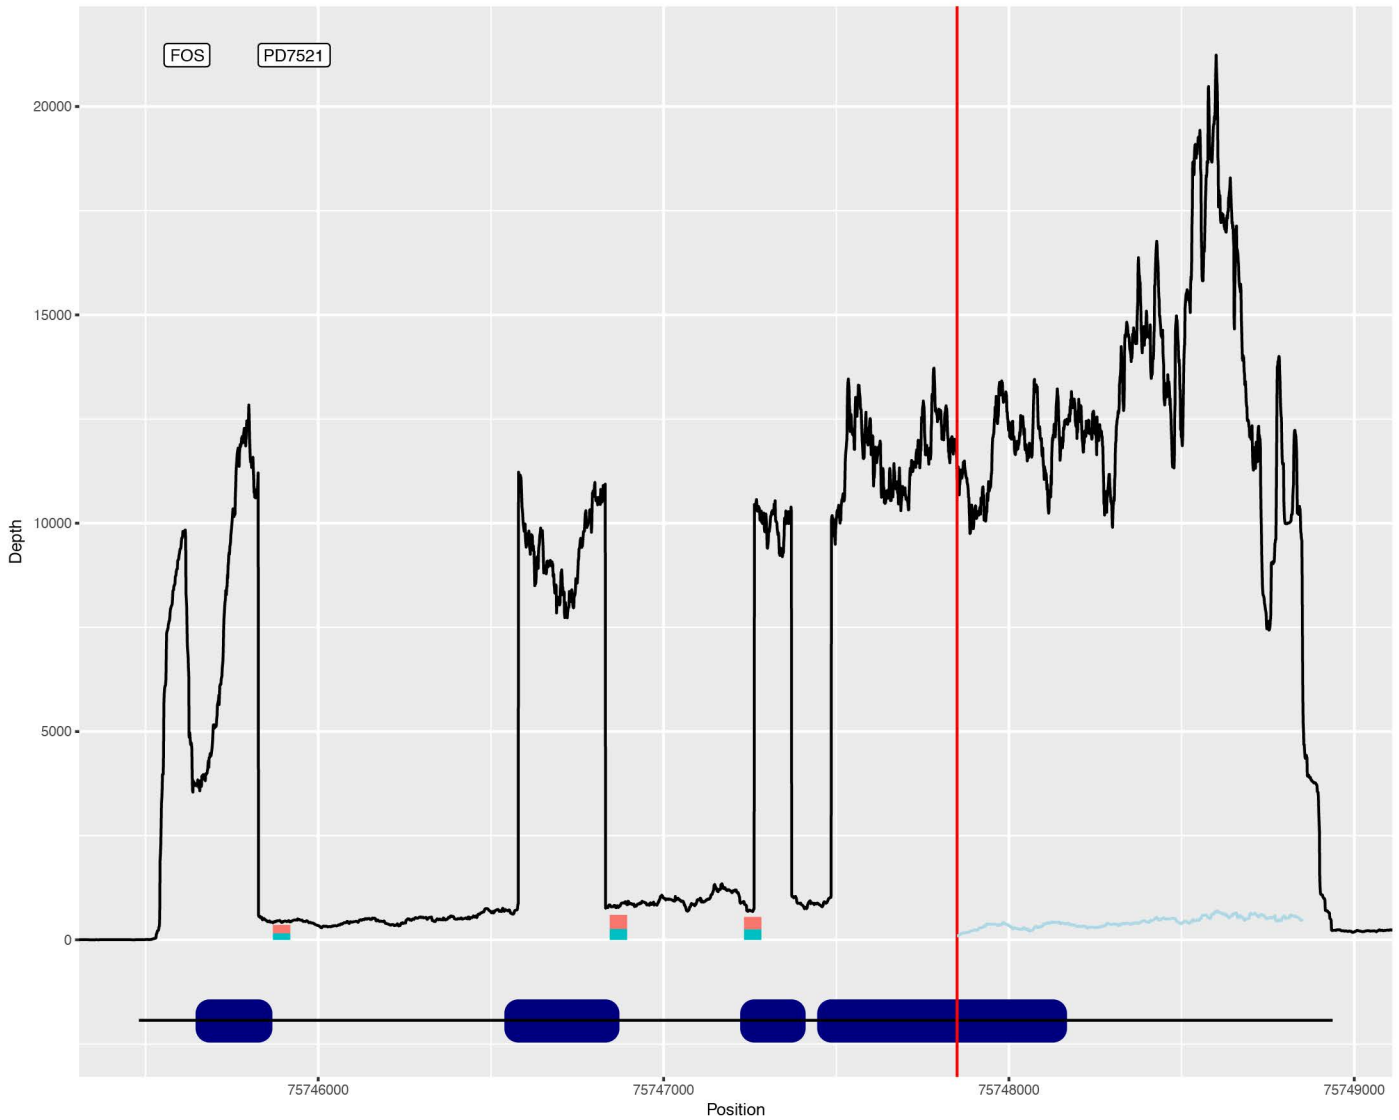



**f**

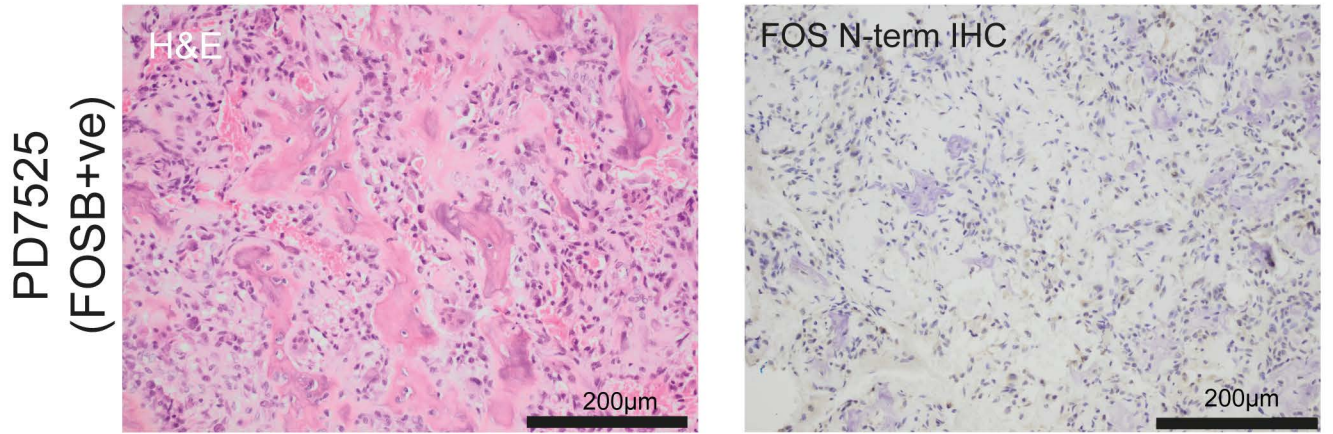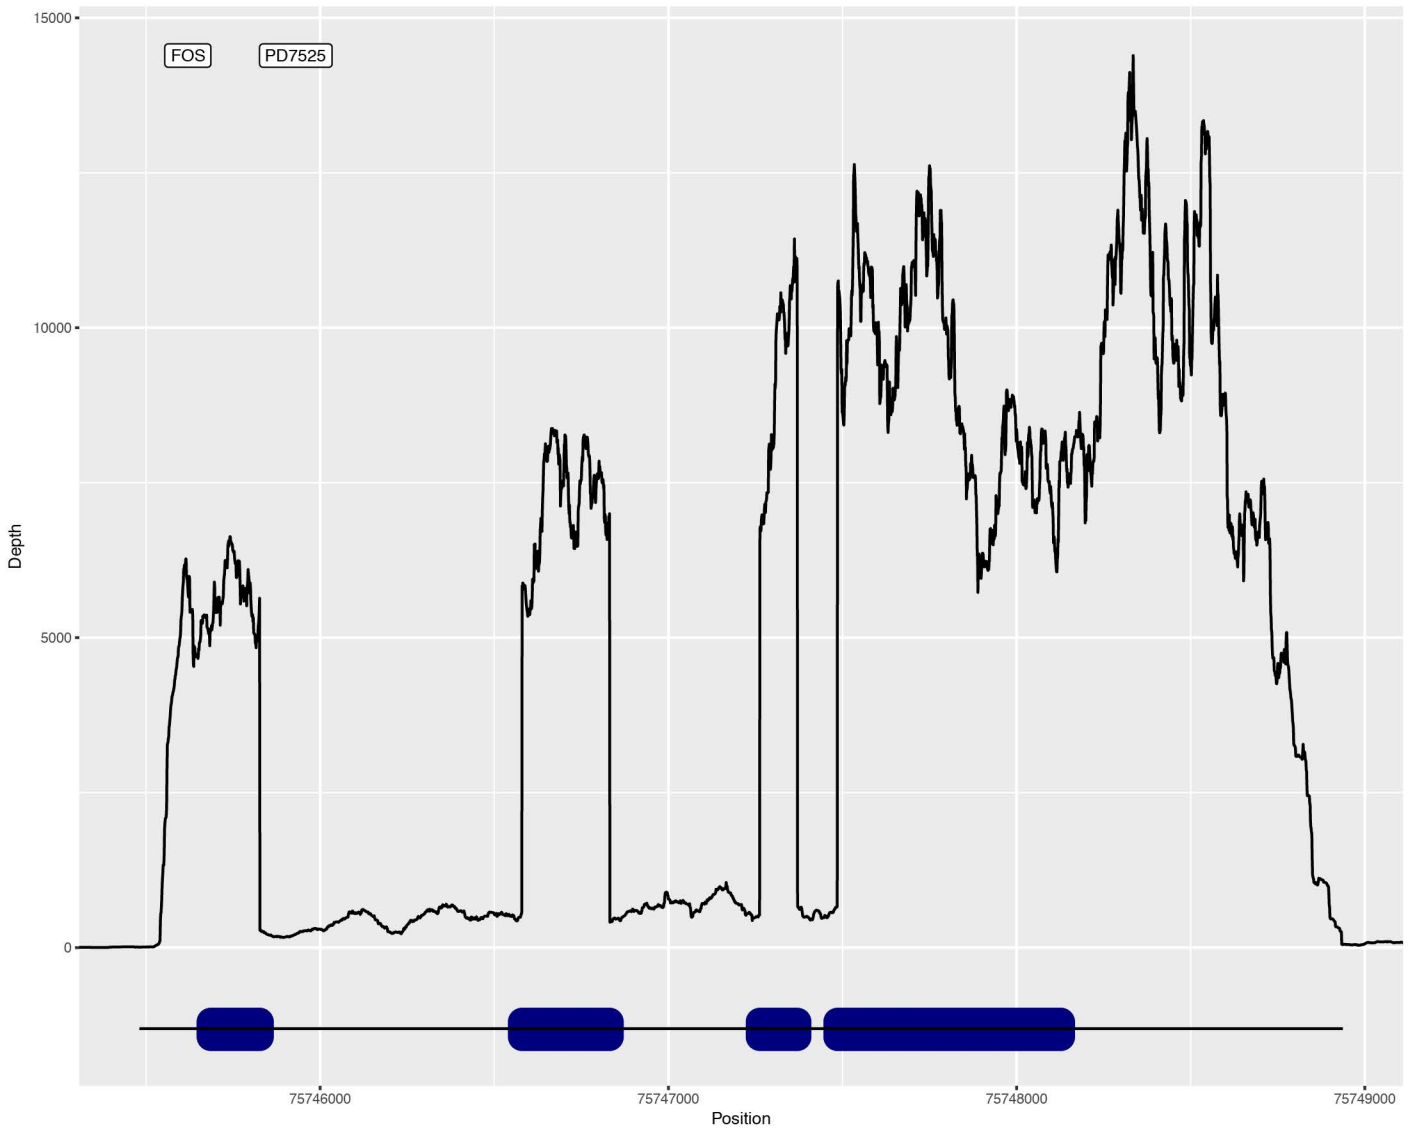

g

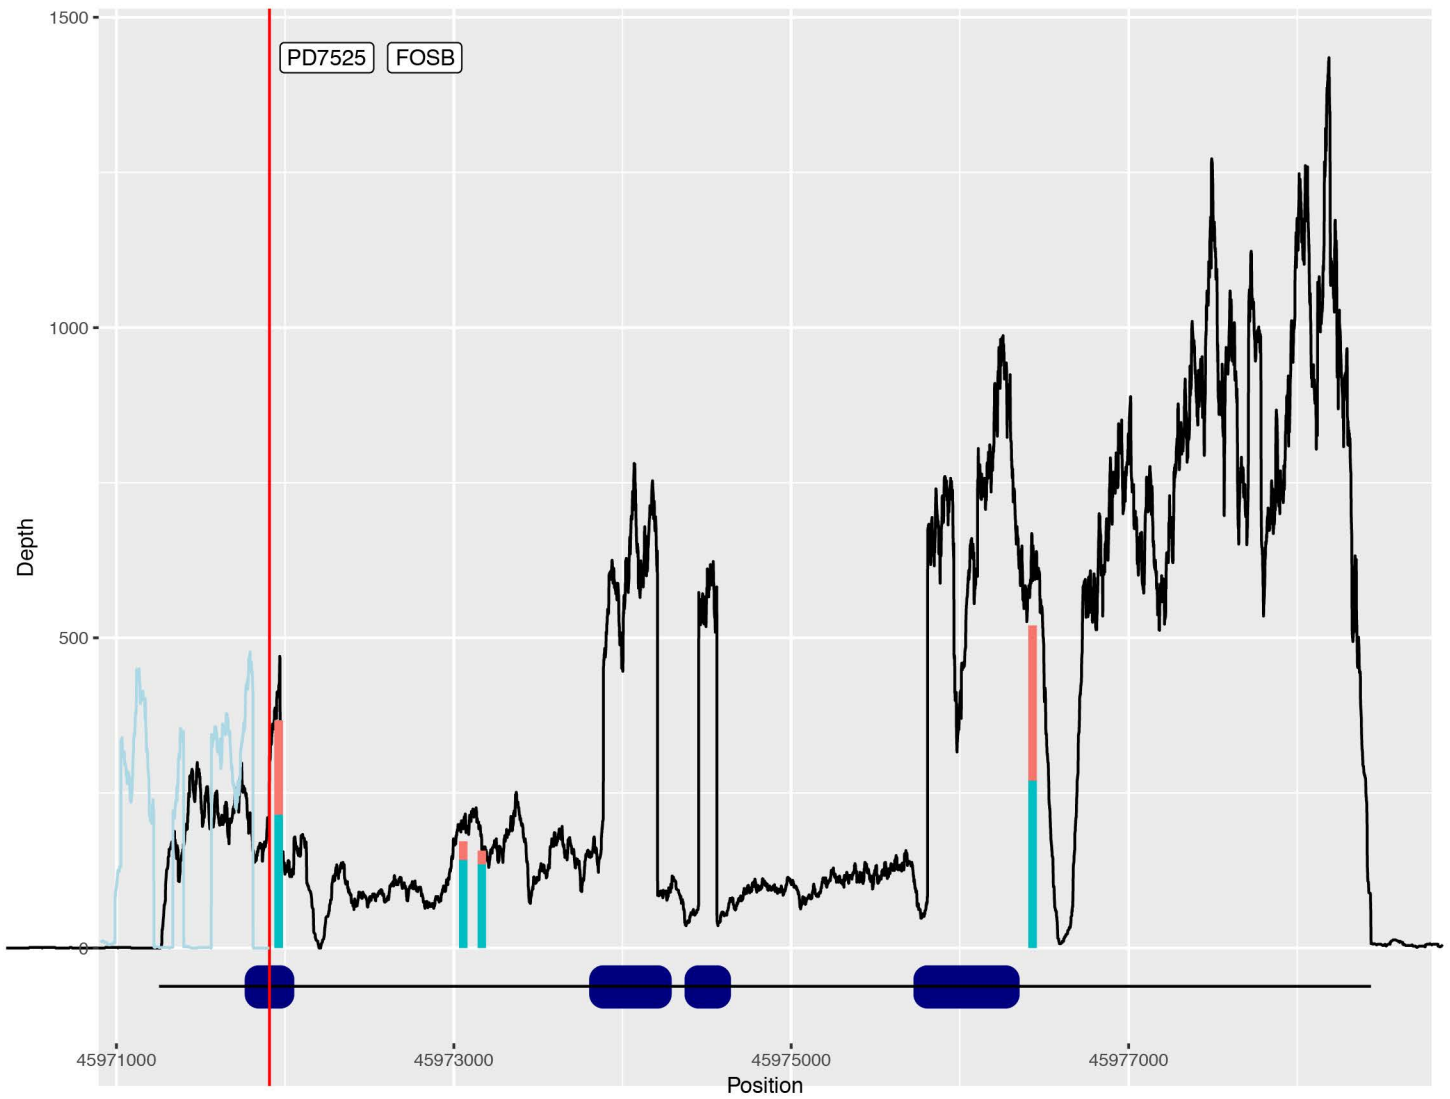

### Supplementary Figure 4. Validation of immunohistochemistry and additional samples

a) Demonstration of stronger nuclear reactivity of the N-terminal FOS antibody than the colonic epithelium positive control, even at the lowest concentration. H&E appearances for this sample are typical for osteoblastoma whilst FISH demonstrates a clear FOS break apart. b) Strong N-terminal FOS immunoreactivity is seen in osteoblastoma cases even for which breakpart signal could not be demonstrated by FISH. c) FOS or FOSB immunostaining was not seen in PD7525 likely owing to decalcification. PD7525 has a proven FOSB breakapart by DNA and RNA sequencing and FISH. FOSB antibody stains a pseudomyogenic haemangioendothelioma positive control well. d) The single osteosarcoma sample that demonstrated strong FOS immunoreactivity, demonstrated a distinct histological pattern and evidence of no FOS breakapart, though there is evidence of an amplification near the locus of FOS.

**a**

FOS fusion +ve osteoblastoma

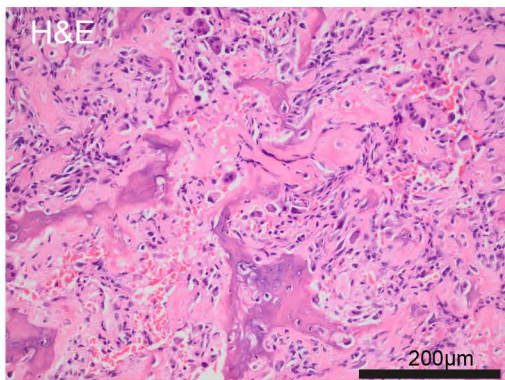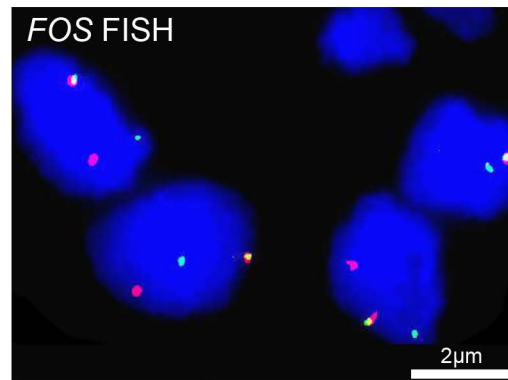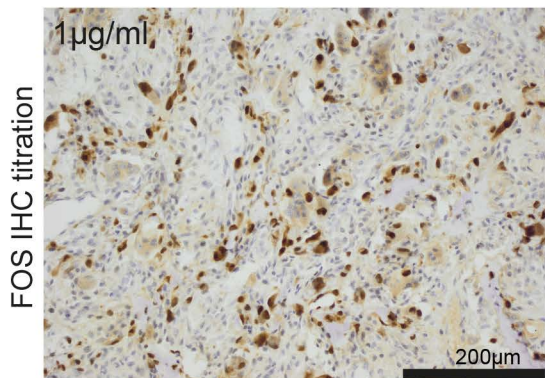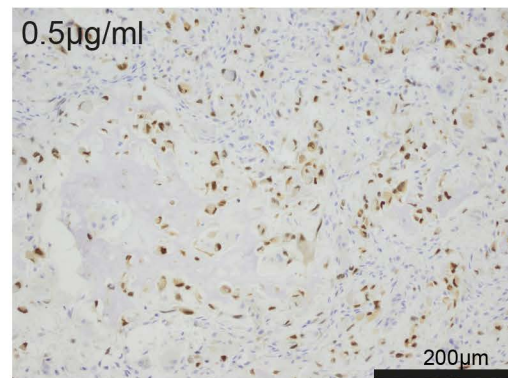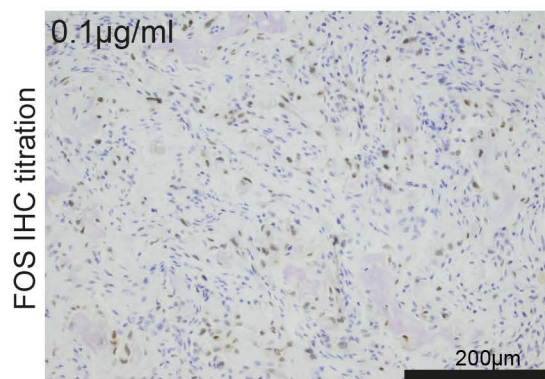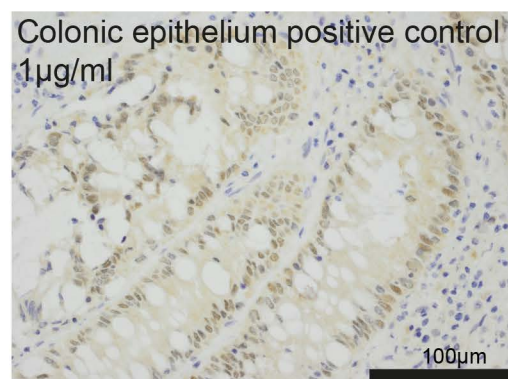

**b**

H+E

FOS IHC

Case 44

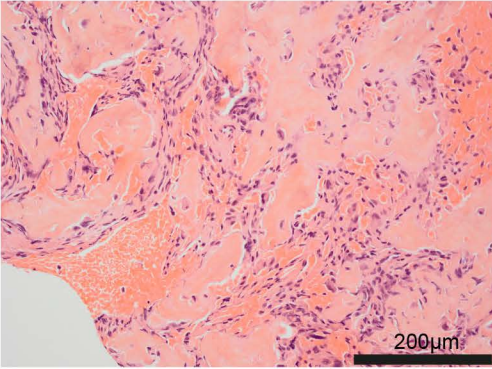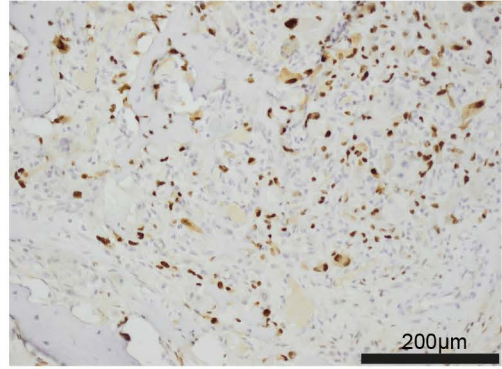

Case 48

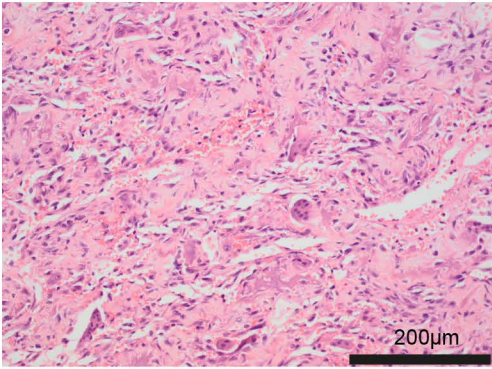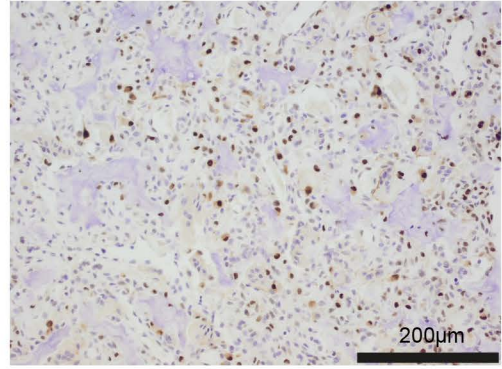

Case 49

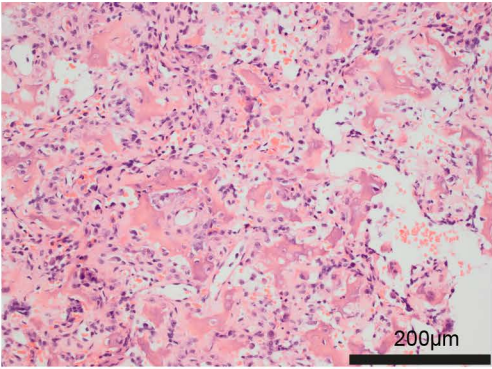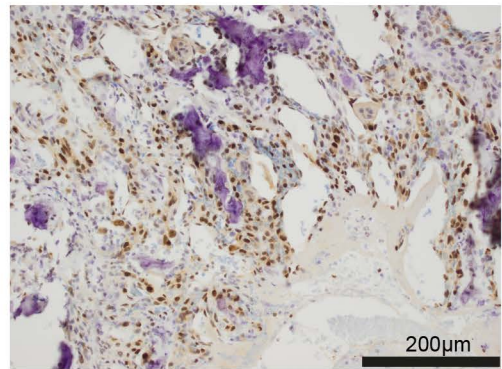

**C**

*FOSB* fusion +ve osteoblastoma

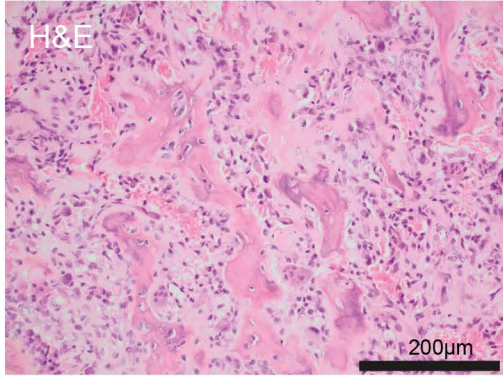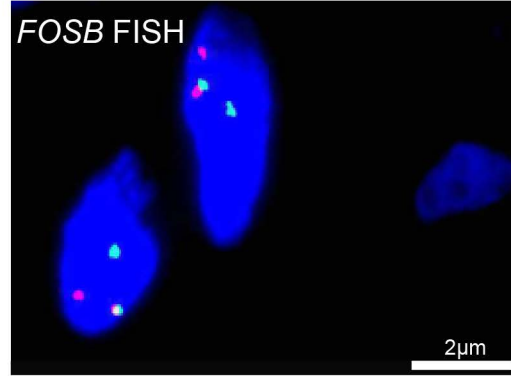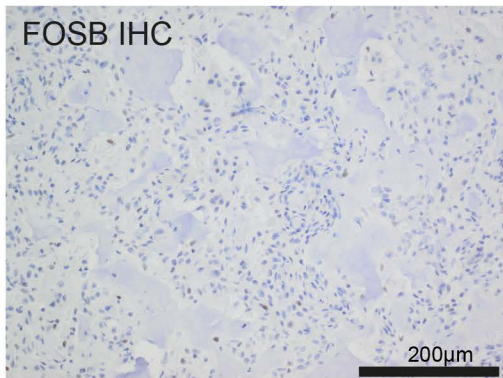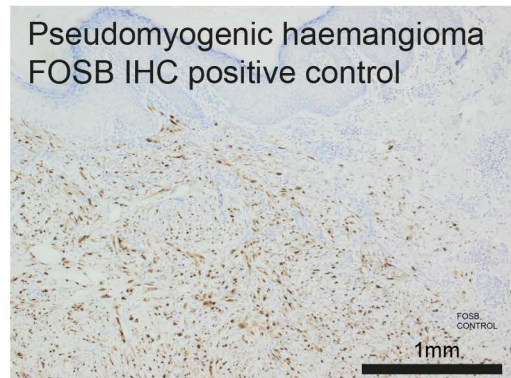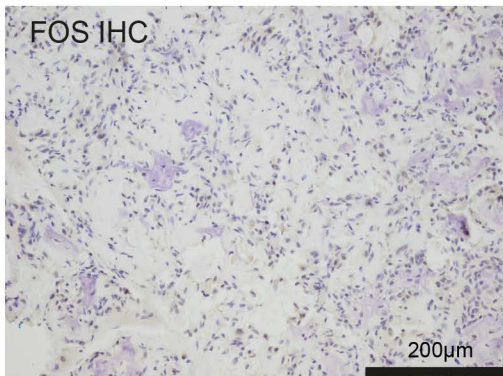

d

Osteosarcoma

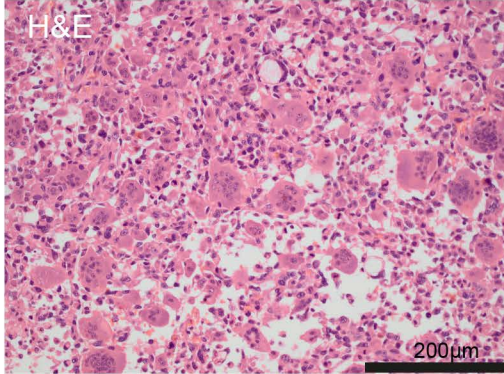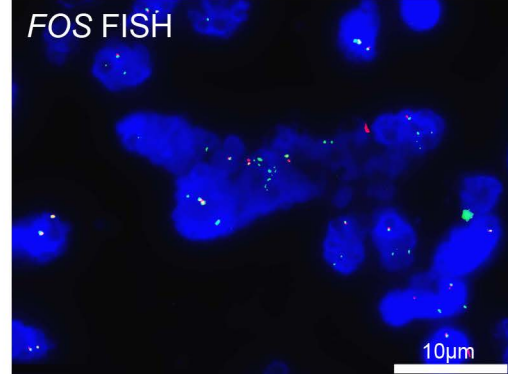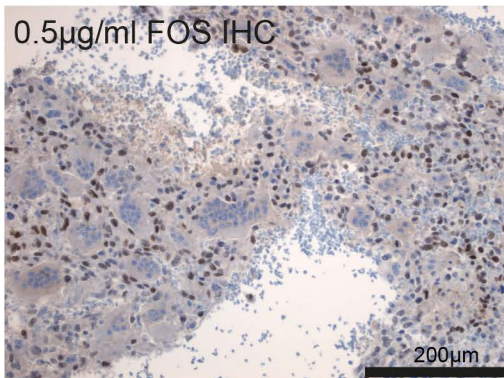

Supplement: 41467_2018_4530_MOESM1_ESM.pdf [file 41467_2018_4530_MOESM1_ESM.pdf]
